# Supplementary material for: Impact of Volatile Organic Compounds on the Growth of Aspergillus flavus and Related Aflatoxin B1 Production: A Review
Source: MDPI journal article supplement (doi:10.3390/ijms232415557), 2022-12-08
Supplement: s1 [file s1]

**Table S1:** Detailed compilation of VOCs known in the literature to be emitted by *A. flavus* sorted by CAS (Chemical Abstracts Service) number.

| (a) Name                                                                   | (b) Cas number | (c) Chemistry family | (d) Strains                           | (e) Reference                                                                                                                                                                                   |                                              | (f) Substrate                                                                                 |
|----------------------------------------------------------------------------|----------------|----------------------|---------------------------------------|-------------------------------------------------------------------------------------------------------------------------------------------------------------------------------------------------|----------------------------------------------|-----------------------------------------------------------------------------------------------|
| 2,4-dimethylpenta-1,3-diene                                                | 1000-87-9      | Alkene               | T                                     | (De Lucca <i>et al.</i> , 2012)                                                                                                                                                                 | [35]                                         | Non-sterile cracked maize                                                                     |
| octa-1,3-diene                                                             | 1002-33-1      | Alkene               | T<br>T<br>U                           | (De Lucca <i>et al.</i> , 2010)<br>(Jeleń and Wąsowicz, 1998)<br>(Polizzi <i>et al.</i> , 2012)                                                                                                 | [34]<br>[41]<br>[38]                         | Cracked maize<br>Wheat and oats<br>Wallpaper                                                  |
| ethylbenzene                                                               | 100-41-4       | Alkene               | U                                     | (Jeleń and Wąsowicz, 1998)                                                                                                                                                                      | [41]                                         | /                                                                                             |
| styrene                                                                    | 100-42-5       | Alkene               | T + NT/T<br>T<br>NT/T<br>U<br>NT<br>T | (De Lucca <i>et al.</i> , 2010)<br>(De Lucca <i>et al.</i> , 2012)<br>(Josselin <i>et al.</i> , 2021)<br>(Jeleń and Wąsowicz, 1998)<br>(Sun <i>et al.</i> , 2014)<br>(Sun <i>et al.</i> , 2016) | [34]<br>[35]<br>[36]<br>[41]<br>[39]<br>[40] | PDA + sterile cracked maize<br>Cracked maize<br>PDA<br>/<br>Maize media<br>CSA, CDL, MEA, CMA |
| phenylmethanol                                                             | 100-51-6       | Alcohol              | T                                     | (De Lucca <i>et al.</i> , 2010)<br>(De Lucca <i>et al.</i> , 2012)                                                                                                                              | [34]<br>[35]                                 | Non-sterile cracked maize<br>Cracked maize                                                    |
| benzaldehyde                                                               | 100-52-7       | Aldehyde             | T                                     | (De Lucca <i>et al.</i> , 2010)                                                                                                                                                                 | [34]                                         | Cracked maize                                                                                 |
| ethyl phenylethanoate                                                      | 101-97-3       | Ester                | T<br>T*                               | (De Lucca <i>et al.</i> , 2010)<br>(Josselin <i>et al.</i> , 2021)                                                                                                                              | [34]<br>[36]                                 | Cracked maize<br>PDA                                                                          |
| dodecan-2-ol                                                               | 10203-28-8     | Alcohol              | T                                     | (De Lucca <i>et al.</i> , 2012)                                                                                                                                                                 | [35]                                         | Non-sterile cracked maize                                                                     |
| eremophilene                                                               | 10219-75-7     | Terpene              | U<br>T                                | (Jeleń and Wąsowicz, 1998)<br>(Zeringue, Bhatnagar and Cleveland, 1993)                                                                                                                         | [41]<br>[45]                                 | /<br>Adye and Mateles liquid medium                                                           |
| 2-ethylcyclobutan-1-one                                                    | 10374-14-8     | Ketone               | T                                     | (De Lucca <i>et al.</i> , 2012)                                                                                                                                                                 | [35]                                         | Non-sterile cracked maize                                                                     |
| benzeacetic acid                                                           | 103-82-2       | Acid                 | T                                     | (De Lucca <i>et al.</i> , 2010)                                                                                                                                                                 | [34]                                         | Cracked maize                                                                                 |
| 4a,8-dimethyl-2-(prop-1-en-2-yl)-<br>1,2,3,4,4a,5,6,7-octahydronaphthalene | 103827-22-1    | Terpene              | T*                                    | (Josselin <i>et al.</i> , 2021)                                                                                                                                                                 | [36]                                         | PDA                                                                                           |
| 3-phenylpropen-2-al                                                        | 104-55-2       | Aldehyde             | NT                                    | (De Lucca <i>et al.</i> , 2010)                                                                                                                                                                 | [34]                                         | PDA                                                                                           |
| 2-ethylhexan-1-ol                                                          | 104-76-7       | Alcohol              | NT/T                                  | (De Lucca <i>et al.</i> , 2010)                                                                                                                                                                 | [34]                                         | Cracked maize                                                                                 |
| ethyl propionate                                                           | 105-37-3       | Ester                | T<br>NT/T<br>NT                       | (De Lucca <i>et al.</i> , 2010)<br>(Josselin <i>et al.</i> , 2021)<br>(Sun <i>et al.</i> , 2014)                                                                                                | [34]<br>[36]<br>[39]                         | Cracked maize<br>PDA<br>Maize media                                                           |
| ethyl butyrate                                                             | 105-54-4       | Ester                | T<br>NT/T                             | (Josselin <i>et al.</i> , 2021)<br>(Sun <i>et al.</i> , 2014)                                                                                                                                   | [36]<br>[39]                                 | PDA<br>Maize media                                                                            |
| 1-(5-methyl-2-furanyl)propan-1-one                                         | 10599-69-6     | Ketone               | T                                     | (De Lucca <i>et al.</i> , 2012)                                                                                                                                                                 | [35]                                         | Non-sterile cracked maize                                                                     |
| ethyl heptanoate                                                           | 106-30-9       | Ester                | T                                     | (De Lucca <i>et al.</i> , 2010)                                                                                                                                                                 | [34]                                         | Cracked maize                                                                                 |
| ethyl octanoate                                                            | 106-32-1       | Ester                | NT+ T                                 | (De Lucca <i>et al.</i> , 2010)                                                                                                                                                                 | [34]                                         | PDA + Cracked maize                                                                           |
| 1,4-dimethylbenzene                                                        | 106-42-3       | Alkene               | NT                                    | (Sun <i>et al.</i> , 2014)                                                                                                                                                                      | [39]                                         | Maize media                                                                                   |
| octan-3-one                                                                | 106-68-3       | Ketone               | NT<br>NT<br>T<br>NT/T                 | (De Lucca <i>et al.</i> , 2010)]<br>(De Lucca <i>et al.</i> , 2012)<br>(Kamiński <i>et al.</i> , 1972)<br>(Sun <i>et al.</i> , 2014)                                                            | [34]<br>[35]<br>[43]<br>[38]                 | PDA<br>Non-sterile cracked maize<br>Wheat meal sterilized<br>Maize media                      |
| 2-methylpentane                                                            | 107-83-5       | Alkane               | T<br>T                                | (De Lucca <i>et al.</i> , 2012)<br>(Sun <i>et al.</i> , 2014)                                                                                                                                   | [35]<br>[39]                                 | Non-sterile cracked maize<br>Maize media                                                      |
| pentan-2-one                                                               | 107-87-9       | Ketone               | NT/T                                  | (Sun <i>et al.</i> , 2014)                                                                                                                                                                      | [39]                                         | Maize media                                                                                   |
| 1,3-dimethylbenzene                                                        | 108-38-3       | Alkene               | T                                     | (De Lucca <i>et al.</i> , 2012)                                                                                                                                                                 | [35]                                         | Non-sterile cracked maize                                                                     |
| ethyl 3-methylbutyrate                                                     | 108-64-5       | Ester                | NT/T                                  | (Sun <i>et al.</i> , 2014)                                                                                                                                                                      | [39]                                         | Maize media                                                                                   |
| 1,3,5-trimethylbenzene                                                     | 108-67-8       | Alkene               | T                                     | (De Lucca <i>et al.</i> , 2012)                                                                                                                                                                 | [35]                                         | Non-sterile cracked maize                                                                     |

|                              |             |          |                   |                                                                                                                                |                              |                                                            |
|------------------------------|-------------|----------|-------------------|--------------------------------------------------------------------------------------------------------------------------------|------------------------------|------------------------------------------------------------|
| methylcyclohexane            | 108-87-2    | Alkane   | T                 | (De Lucca <i>et al.</i> , 2012)                                                                                                | [35]                         | Sterile cracked maize                                      |
| toluene                      | 108-88-3    | Alkene   | T<br>T<br>NT<br>T | (De Lucca <i>et al.</i> , 2010)<br>(Josselin <i>et al.</i> , 2021)<br>(Sun <i>et al.</i> , 2014)<br>(Sun <i>et al.</i> , 2016) | [34]<br>[36]<br>[39]<br>[40] | Cracked maize<br>PDA<br>Maize media<br>CDA, CSA, CDL, MEA, |
| aromadrendrene               | 109119-91-7 | Terpene  | U<br>T            | (Jeleń and Wąsowicz, 1998)<br>(Josselin <i>et al.</i> , 2021)                                                                  | [41]<br>[36]                 | /<br>PDA                                                   |
| pentane                      | 109-66-0    | Alkane   | NT/T              | (Sun <i>et al.</i> , 2014)                                                                                                     | [39]                         | Maize media                                                |
| tetrahydrofuran              | 109-99-9    | Furan    | T<br>T            | (De Lucca <i>et al.</i> , 2010)<br>(De Lucca <i>et al.</i> , 2012)                                                             | [34]<br>[35]                 | Cracked maize<br>Non-sterile cracked maize                 |
| furan                        | 110-00-9    | Furan    | NT/T              | (Sun <i>et al.</i> , 2014)                                                                                                     | [39]                         | Maize media                                                |
| propan-2-yl tetradecanoate   | 110-27-0    | Ester    | T                 | (De Lucca <i>et al.</i> , 2010)                                                                                                | [34]                         | Cracked maize                                              |
| alpha-cedrene                | 11028-42-5  | Terpene  | U                 | (Polizzi <i>et al.</i> , 2012)                                                                                                 | [38]                         | Wallpaper                                                  |
| heptan-2-one                 | 110-43-0    | Ketone   | U<br>U<br>NT/T    | (Gao <i>et al.</i> , 2002) *<br>(Polizzi <i>et al.</i> , 2012)<br>(Sun <i>et al.</i> , 2014)                                   | [39]<br>[38]<br>[39]         | Gypsum board<br>Malt extract agar<br>Maize media           |
| hexane                       | 110-54-3    | Alkane   | T<br>T<br>NT/T    | (De Lucca <i>et al.</i> , 2010)<br>(De Lucca <i>et al.</i> , 2012)<br>(Josselin <i>et al.</i> , 2021)                          | [34]<br>[35]<br>[36]         | PDA<br>Non-sterile cracked maize<br>PDA                    |
| pentanal                     | 110-62-3    | Aldehyde | NT                | (Sun <i>et al.</i> , 2014)                                                                                                     | [39]                         | Maize media                                                |
| octan-2-one                  | 111-13-7    | Ketone   | NT/T              | (Sun <i>et al.</i> , 2014)                                                                                                     | [39]                         | Maize media                                                |
| hexan-1-ol                   | 111-27-3    | Alcohol  | NT/T<br>T         | (Spraker <i>et al.</i> , 2014)<br>(De Lucca <i>et al.</i> , 2012)                                                              | [44]<br>[35]                 | Maize media<br>Non-sterile cracked maize                   |
| butoxyethene                 | 111-34-2    | Ether    | T                 | (De Lucca <i>et al.</i> , 2012)                                                                                                | [35]                         | Non-sterile cracked maize                                  |
| 2-methylbut-2-enal           | 1115-11-3   | Aldehyde | NT<br>NT<br>NT/T  | (De Lucca <i>et al.</i> , 2010)<br>(De Lucca <i>et al.</i> , 2012)<br>(Josselin <i>et al.</i> , 2021)                          | [34]<br>[35]<br>[36]         | PDA<br>Non-sterile cracked maize<br>PDA                    |
| octane                       | 111-65-9    | Alkane   | NT/T<br>T<br>NT/T | (De Lucca <i>et al.</i> , 2010)<br>(Josselin <i>et al.</i> , 2021)<br>(Sun <i>et al.</i> , 2014)                               | [34]<br>[36]<br>[39]         | Cracked maize<br>PDA<br>Maize media                        |
| oct-1-ene                    | 111-66-0    | Alkene   | T<br>T            | (De Lucca <i>et al.</i> , 2010)<br>(De Lucca <i>et al.</i> , 2012)                                                             | [34]<br>[35]                 | Cracked maize<br>Non-sterile cracked maize                 |
| oct-2-ene                    | 111-67-1    | Alkene   | T                 | (De Lucca <i>et al.</i> , 2012)                                                                                                | [35]                         | Non-sterile cracked maize                                  |
| 2-butoxyethanol              | 111-76-2    | Alcohol  | T                 | (De Lucca <i>et al.</i> , 2010)                                                                                                | [34]                         | Cracked maize                                              |
| nonane                       | 111-84-2    | Alkane   | NT/T              | (De Lucca <i>et al.</i> , 2010)                                                                                                | [34]                         | Cracked maize                                              |
| octan-1-ol                   | 111-87-5    | Alcohol  | U                 | (Jeleń and Wąsowicz, 1998)                                                                                                     | [41]                         | /                                                          |
| 2-(2-ethoxyethoxy)-ethanol   | 111-90-0    | Alcohol  | T                 | (De Lucca <i>et al.</i> , 2010)                                                                                                | [34]                         | Cracked maize                                              |
| dodec-1-ene                  | 1120-36-1   | Alkene   | T*                | (Josselin <i>et al.</i> , 2021)                                                                                                | [36]                         | PDA                                                        |
| nonanoic acid                | 112-05-0    | Acid     | T                 | (De Lucca <i>et al.</i> , 2010)                                                                                                | [34]                         | Cracked maize                                              |
| heptyl acetate               | 112-06-1    | Ester    | T                 | (De Lucca <i>et al.</i> , 2012)                                                                                                | [35]                         | Non-sterile cracked maize                                  |
| 2-methylcyclopent-2-en-1-one | 1120-73-6   | Ketone   | T                 | (De Lucca <i>et al.</i> , 2012)                                                                                                | [35]                         | Sterile cracked maize                                      |
| 2-methylcyclohex-2-en-1-one  | 1121-18-2   | Ketone   | T                 | (De Lucca <i>et al.</i> , 2012)                                                                                                | [35]                         | Non-sterile cracked maize                                  |
| decan-1-ol                   | 112-30-1    | Alcohol  | T                 | (Josselin <i>et al.</i> , 2021)                                                                                                | [36]                         | PDA                                                        |
| decanal                      | 112-31-2    | Aldehyde | T<br>T            | (De Lucca <i>et al.</i> , 2010)<br>(Sun <i>et al.</i> , 2016)                                                                  | [34]<br>[40]                 | Cracked maize<br>CDA, CSA, CDL, MEA, CMA                   |
| dodecane                     | 112-40-3    | Alkane   | NT/T<br>T         | (De Lucca <i>et al.</i> , 2010)<br>(Sun <i>et al.</i> , 2016)                                                                  | [34]<br>[40]                 | Cracked maize<br>CDA, CSA, CDL, MEA, CMA                   |

|                                              |            |          |                                     |                                                                                                                                                                                                           |                                              |                                                                                      |
|----------------------------------------------|------------|----------|-------------------------------------|-----------------------------------------------------------------------------------------------------------------------------------------------------------------------------------------------------------|----------------------------------------------|--------------------------------------------------------------------------------------|
| 13-docosenamide                              | 112-84-5   | Amide    | T                                   | (De Lucca <i>et al.</i> , 2010)                                                                                                                                                                           | [34]                                         | PDA                                                                                  |
| eicosane                                     | 112-95-8   | Alkane   | NT/T                                | (De Lucca <i>et al.</i> , 2010)                                                                                                                                                                           | [34]                                         | Cracked maize                                                                        |
| propene                                      | 115-07-1   | Alkene   | T                                   | (De Lucca <i>et al.</i> , 2012)                                                                                                                                                                           | [35]                                         | Sterile cracked maize                                                                |
| beta-humulene                                | 116-04-1   | Terpene  | T                                   | (Sun <i>et al.</i> , 2016)                                                                                                                                                                                | [40]                                         | CSA, CDL, MEA                                                                        |
| 2-methylbutanoic acid                        | 116-53-0   | Acid     | NT                                  | (Sun <i>et al.</i> , 2014)                                                                                                                                                                                | [39]                                         | Maize media                                                                          |
| (Z)-1,2-dimethylcyclopentane                 | 1192-18-3  | Alkane   | T                                   | (De Lucca <i>et al.</i> , 2012)                                                                                                                                                                           | [35]                                         | Sterile cracked maize                                                                |
| benzeneacetaldehyde                          | 122-78-1   | Aldehyde | T                                   | (De Lucca <i>et al.</i> , 2010)                                                                                                                                                                           | [34]                                         | Cracked maize                                                                        |
| 2-phenoxyethanol                             | 122-99-6   | Alcohol  | T<br>U                              | (De Lucca <i>et al.</i> , 2010)<br>(Polizzi <i>et al.</i> , 2012)                                                                                                                                         | [34]<br>[38]                                 | Cracked maize<br>Wallpaper                                                           |
| 4-ethylphenol                                | 123-07-9   | Alcohol  | T                                   | (De Lucca <i>et al.</i> , 2012)                                                                                                                                                                           | [35]                                         | Non-sterile cracked maize                                                            |
| 3-methylbutan-1-ol                           | 123-51-3   | Alcohol  | NT/T<br>U<br>U<br>NT/T<br>NT/T<br>T | (De Lucca <i>et al.</i> , 2010)<br>(Gao <i>et al.</i> , 2002)<br>(Jeleń and Wąsowicz, 1998)<br>(Josselin <i>et al.</i> , 2021)<br>(Sun <i>et al.</i> , 2014)<br>(Zeringue, Bhatnagar and Cleveland, 1993) | [34]<br>[42]<br>[41]<br>[36]<br>[39]<br>[45] | PDA + cracked maize<br>Gypsum board<br>/<br>Maize media<br>PDA<br>MEA + Gypsum board |
| ethyl hexanoate                              | 123-66-0   | Ester    | T                                   | (De Lucca <i>et al.</i> , 2010)                                                                                                                                                                           | [34]                                         | Cracked maize                                                                        |
| non-1-ene                                    | 124-11-8   | Alkene   | T<br>T                              | (De Lucca <i>et al.</i> , 2010)<br>(De Lucca <i>et al.</i> , 2012)                                                                                                                                        | [34]<br>[35]                                 | Cracked maize<br>Non-sterile cracked maize                                           |
| octanal                                      | 124-13-0   | Aldehyde | T<br>T                              | (De Lucca <i>et al.</i> , 2010)<br>(De Lucca <i>et al.</i> , 2012)                                                                                                                                        | [34]<br>[35]                                 | Cracked maize<br>Non-sterile cracked maize                                           |
| decane                                       | 124-18-5   | Alkane   | NT<br>T<br>NT                       | (De Lucca <i>et al.</i> , 2010)<br>(De Lucca <i>et al.</i> , 2012)<br>(Sun <i>et al.</i> , 2014)                                                                                                          | [34]<br>[35]<br>[39]                         | Cracked maize<br>Non-sterile cracked maize<br>Maize media                            |
| nonanal                                      | 124-19-6   | Aldehyde | NT/T                                | (De Lucca <i>et al.</i> , 2010)                                                                                                                                                                           | [34]                                         | Cracked maize                                                                        |
| isobornyl acetate                            | 125-12-2   | Ester    | T                                   | (De Lucca <i>et al.</i> , 2010)                                                                                                                                                                           | [34]                                         | Cracked maize                                                                        |
| 2,6-dimethyldecane                           | 13150-81-7 | Alkane   | T                                   | (De Lucca <i>et al.</i> , 2012)                                                                                                                                                                           | [35]                                         | Sterile cracked maize                                                                |
| 4-methyldec-1-ene                            | 13151-29-6 | Alkene   | T                                   | (De Lucca <i>et al.</i> , 2012)                                                                                                                                                                           | [35]                                         | Non-sterile cracked maize                                                            |
| 3a,4,7,7,7a-Tetrahydro-4,7-methano-1H-indene | 13257-74-4 | Terpene  | T                                   | (De Lucca <i>et al.</i> , 2010)                                                                                                                                                                           | [34]                                         | Cracked maize                                                                        |
| 6-methyltridecane                            | 13287-21-3 | Alkane   | T                                   | (De Lucca <i>et al.</i> , 2012)                                                                                                                                                                           | [35]                                         | Non-sterile cracked maize                                                            |
| pentadec-1-ene                               | 13360-61-7 | Alkene   | T                                   | (De Lucca <i>et al.</i> , 2012)                                                                                                                                                                           | [35]                                         | Non-sterile cracked maize                                                            |
| (E)-alpha-bergamotene                        | 13474-59-4 | Terpene  | T                                   | (Sun <i>et al.</i> , 2016)                                                                                                                                                                                | [40]                                         | CDA, CSA, CDL, MEA, CMA                                                              |
| 9-octyleicosane                              | 13475-77-9 | Alkane   | NT                                  | (De Lucca <i>et al.</i> , 2012)                                                                                                                                                                           | [35]                                         | Non-sterile cracked maize                                                            |
| 2,2,4,6,6-pentamethylheptane                 | 13475-82-6 | Alkane   | NT/T                                | (Josselin <i>et al.</i> , 2021)                                                                                                                                                                           | [36]                                         | PDA                                                                                  |
| 2,5-dimethylcyclohexa-2,5-diene-1,4-dione    | 137-18-8   | Ketone   | T                                   | (De Lucca <i>et al.</i> , 2012)                                                                                                                                                                           | [35]                                         | Sterile cracked maize                                                                |
| 2-methylbutan-1-ol                           | 137-32-6   | Alcohol  | NT/T<br>U<br>NT/T<br>U              | (De Lucca <i>et al.</i> , 2010)<br>(Gao <i>et al.</i> , 2002)<br>(Josselin <i>et al.</i> , 2021)<br>(Spraker <i>et al.</i> , 2014)                                                                        | [34]<br>[39]<br>[36]<br>[44]                 | Cracked maize<br>MEA<br>PDA<br>Maize media                                           |
| beta-cubebene                                | 13744-15-5 | Terpene  | U<br>T<br>T                         | (Jeleń and Wąsowicz, 1998)<br>(Sun <i>et al.</i> , 2016)<br>(Zeringue, Bhatnagar and Cleveland, 1993)                                                                                                     | [41]<br>[40]<br>[45]                         | /<br>CDA, CSA, CDL, CMA<br>Adye and Mateles liquid medium                            |
| limonene                                     | 138-86-3   | Terpene  | T<br>T<br>U<br>T                    | (De Lucca <i>et al.</i> , 2010)<br>(De Lucca <i>et al.</i> , 2012)<br>(Jeleń and Wąsowicz, 1998)<br>(Sun <i>et al.</i> , 2016)                                                                            | [34]<br>[35]<br>[41]<br>[40]                 | Cracked maize<br>Sterile cracked maize<br>/<br>CSA, CDL, MEA, CMA                    |

|                                                         |              |          |                            |                                                                                                                                     |                              |                                                                    |
|---------------------------------------------------------|--------------|----------|----------------------------|-------------------------------------------------------------------------------------------------------------------------------------|------------------------------|--------------------------------------------------------------------|
| ethyl acetate                                           | 141-78-6     | Ester    | NT+T<br>NT<br>NT/T<br>NT/T | (De Lucca <i>et al.</i> , 2010)<br>(De Lucca <i>et al.</i> , 2012)<br>(Sun <i>et al.</i> , 2014)<br>(Josselin <i>et al.</i> , 2021) | [34]<br>[35]<br>[39]<br>[36] | PDA + cracked maize<br>Sterile cracked maize<br>Maize media<br>PDA |
| 1,3-diethylbenzene                                      | 141-93-5     | Alkene   | T                          | (De Lucca <i>et al.</i> , 2012)                                                                                                     | [35]                         | Non-sterile cracked maize                                          |
| ethyl acetoacetate                                      | 141-97-9     | Ester    | T                          | (De Lucca <i>et al.</i> , 2012)                                                                                                     | [35]                         | Sterile cracked maize                                              |
| heptane                                                 | 142-82-5     | Alkane   | NT/T<br>NT/T<br>NT/T       | (De Lucca <i>et al.</i> , 2010)<br>(Josselin <i>et al.</i> , 2021)<br>(Sun <i>et al.</i> , 2014)                                    | [34]<br>[36]<br>[39]         | Cracked maize<br>PDA<br>Maize media                                |
| (2E,4E)-hexa-2,4-dienal                                 | 142-83-6     | Aldehyde | T<br>T                     | (De Lucca <i>et al.</i> , 2010)<br>(De Lucca <i>et al.</i> , 2012)                                                                  | [34]<br>[35]                 | Non-sterile cracked maize<br>Sterile cracked maize                 |
| (Z)-9-octadecen-1-ol                                    | 143-28-2 cis | Alcohol  | T                          | (De Lucca <i>et al.</i> , 2010)                                                                                                     | [34]                         | Cracked maize                                                      |
| 2,3,3-trimethylcyclobutanone                            | 1449-49-6    | Ketone   | T                          | (De Lucca <i>et al.</i> , 2012)                                                                                                     | [35]                         | Non-sterile cracked maize                                          |
| cadina-1(10),6,8-triene                                 | 1460-96-4    | Terpene  | T                          | (Sun <i>et al.</i> , 2016)                                                                                                          | [40]                         | CDA, CSA, CDL, MEA                                                 |
| beta-himachalene                                        | 1461-03-6    | Terpene  | NT/T<br>U                  | (Josselin <i>et al.</i> , 2021)<br>(Polizzi <i>et al.</i> , 2012)                                                                   | [36]<br>[38]                 | PDA<br>Wallpaper                                                   |
| 2,6,10-trimethyltetradecane                             | 14905-56-7   | Alkane   | T                          | (De Lucca <i>et al.</i> , 2010)                                                                                                     | [34]                         | Cracked maize                                                      |
| ylangene                                                | 14912-44-8   | Terpene  | T                          | (Sun <i>et al.</i> , 2016)                                                                                                          | [40]                         | CDA, CSA, CDL, MEA                                                 |
| methylcyclooctane                                       | 1502-38-1    | Alkane   | T<br>T*                    | (De Lucca <i>et al.</i> , 2012)<br>(Josselin <i>et al.</i> , 2021)                                                                  | [35]<br>[36]                 | Non-sterile cracked maize<br>PDA                                   |
| bicyclo[4.4.0]dec-1-en,2-isopropyl-5-methyl-9-methylene | 150320-52-8  | Terpene  | T<br>T                     | (Sun <i>et al.</i> , 2016)<br>(Zeringue, Bhatnagar and Cleveland, 1993)                                                             | [40]<br>[45]                 | CDA, CDL, MEA, CMA<br>Adye and Mateles liquid medium               |
| 5,5-dimethylhexa-1,3-diene                              | 1515-79-3    | Alkene   | NT                         | (De Lucca <i>et al.</i> , 2010)                                                                                                     | [34]                         | PDA                                                                |
| 2-methyloctadecane                                      | 1560-88-9    | Alkane   | T                          | (De Lucca <i>et al.</i> , 2012)                                                                                                     | [35]                         | Non-sterile cracked maize                                          |
| 2-methylheptadecane                                     | 1560-89-0    | Alkane   | T                          | (De Lucca <i>et al.</i> , 2012)                                                                                                     | [35]                         | Non-sterile cracked maize                                          |
| (Z)-muurola-3,5-diene                                   | 157374-44-2  | Terpene  | T                          | (Josselin <i>et al.</i> , 2021)                                                                                                     | [36]                         | PDA                                                                |
| 4-ethyloctane                                           | 15869-86-0   | Alkane   | T                          | (De Lucca <i>et al.</i> , 2012)                                                                                                     | [35]                         | Non-sterile cracked maize                                          |
| 2,5-dimethyloctane                                      | 15869-89-3   | Alkane   | T                          | (De Lucca <i>et al.</i> , 2012)                                                                                                     | [35]                         | Non-sterile cracked maize                                          |
| docos-1-ene                                             | 1599-67-3    | Alkene   | T                          | (De Lucca <i>et al.</i> , 2012)                                                                                                     | [35]                         | Non-sterile cracked maize                                          |
| 2,3-dimethylpenta-1,3-diene                             | 1625-49-6    | Alkene   | NT                         | (De Lucca <i>et al.</i> , 2012)                                                                                                     | [35]                         | Non-sterile cracked maize                                          |
| 1,1-dimethylcyclopentane                                | 1630-94-0    | Alkane   | T                          | (De Lucca <i>et al.</i> , 2012)                                                                                                     | [35]                         | Non-sterile cracked maize                                          |
| 5-methylundecane                                        | 1632-70-8    | Alkane   | T                          | (De Lucca <i>et al.</i> , 2012)                                                                                                     | [35]                         | Non-sterile cracked maize                                          |
| 4-ethyldecane                                           | 1636-44-8    | Alkane   | T                          | (De Lucca <i>et al.</i> , 2012)                                                                                                     | [35]                         | Non-sterile cracked maize                                          |
| undecan-2-ol*                                           | 1653-30-1    | Alcohol  | T                          | (De Lucca <i>et al.</i> , 2012)                                                                                                     | [35]                         | Non-sterile cracked maize                                          |
| 1-methyl-3-prop-1-en-2-ylcyclohexene                    | 16580-24-8   | Alkene   | T                          | (De Lucca <i>et al.</i> , 2012)                                                                                                     | [35]                         | Non-sterile cracked maize                                          |
| ethylcyclohexane                                        | 1678-91-7    | Alkane   | T                          | (De Lucca <i>et al.</i> , 2012)                                                                                                     | [35]                         | Non-sterile cracked maize                                          |
| heptadecan-2-ol                                         | 16813-18-6   | Alcohol  | T                          | (De Lucca <i>et al.</i> , 2012)                                                                                                     | [35]                         | Non-sterile cracked maize                                          |
| alpha-cuparene                                          | 16982-00-6   | Terpene  | U                          | (Polizzi <i>et al.</i> , 2012)                                                                                                      | [38]                         | Wallpaper                                                          |
| beta-selinene                                           | 17066-67-0   | Terpene  | T                          | (Josselin <i>et al.</i> , 2021)                                                                                                     | [36]                         | PDA                                                                |
| 2,6-dimethylundecane                                    | 17301-23-4   | Alkane   | T                          | (De Lucca <i>et al.</i> , 2012)                                                                                                     | [35]                         | Non-sterile cracked maize                                          |
| 4,5-dimethylnonane                                      | 17302-23-7   | Alkane   | T<br>T                     | (De Lucca <i>et al.</i> , 2010)<br>(De Lucca <i>et al.</i> , 2012)                                                                  | [34]<br>[35]                 | Cracked maize<br>Non-sterile cracked maize                         |
| 2,5-dimethylnonane                                      | 17302-27-1   | Alkane   | T                          | (De Lucca <i>et al.</i> , 2010)                                                                                                     | [34]                         | Cracked maize                                                      |
| 2,6-dimethylnonane                                      | 17302-28-2   | Alkane   | T                          | (De Lucca <i>et al.</i> , 2012)                                                                                                     | [35]                         | Non-sterile cracked maize                                          |
| 2,5-dimethyldecane                                      | 17312-50-4   | Alkane   | T                          | (De Lucca <i>et al.</i> , 2010)                                                                                                     | [34]                         | Cracked maize                                                      |
| 3,7-dimethyldecane                                      | 17312-54-8   | Alkane   | T                          | (De Lucca <i>et al.</i> , 2012)                                                                                                     | [35]                         | Non-sterile cracked maize                                          |
| alpha.-cubebene                                         | 17699-14-8   | Terpene  | T                          | (De Lucca <i>et al.</i> , 2012)                                                                                                     | [35]                         | Non-sterile cracked maize                                          |

|                                                             |            |          |             |                                                                                                            |                      |                                            |
|-------------------------------------------------------------|------------|----------|-------------|------------------------------------------------------------------------------------------------------------|----------------------|--------------------------------------------|
|                                                             |            |          | T<br>T      | (Josselin <i>et al.</i> , 2021)<br>(Sun <i>et al.</i> , 2016)                                              | [36]<br>[40]         | PDA<br>CDA, CSA, CDL, MEA, CMA             |
| p-mentha-1,3,8-triene                                       | 18368-95-1 | Terpene  | NT          | (De Lucca <i>et al.</i> , 2012)                                                                            | [35]                 | Non-sterile cracked maize                  |
| beta-chamigrene                                             | 18431-82-8 | Terpene  | T*          | (Josselin <i>et al.</i> , 2021)                                                                            | [36]                 | PDA                                        |
| 5-methylhexanal                                             | 1860-39-5  | Aldehyde | T           | (De Lucca <i>et al.</i> , 2012)                                                                            | [35]                 | Non-sterile cracked maize                  |
| hept-2-enal                                                 | 18829-55-5 | Aldehyde | T<br>NT     | (De Lucca <i>et al.</i> , 2012)<br>(Sun <i>et al.</i> , 2014)                                              | [35]<br>[39]         | Non-sterile cracked maize<br>Maize media   |
| hexacos-1-ene                                               | 18835-33-1 | Alkene   | T           | (De Lucca <i>et al.</i> , 2012)                                                                            | [35]                 | Non-sterile cracked maize                  |
| dec-3-ene                                                   | 19398-37-9 | Alkene   | T           | (De Lucca <i>et al.</i> , 2012)                                                                            | [35]                 | Non-sterile cracked maize                  |
| 3-dodec-2-enyloxolane-2,5-dione                             | 19780-11-1 | Ketone   | T           | (De Lucca <i>et al.</i> , 2010)                                                                            | [34]                 | Cracked maize                              |
| tau-murolol                                                 | 19912-62-0 | Terpene  | T*          | (Josselin <i>et al.</i> , 2021)                                                                            | [36]                 | PDA                                        |
| epi-cubeno-1-ol                                             | 19912-67-5 | Terpene  | T           | (Josselin <i>et al.</i> , 2021)                                                                            | [36]                 | PDA                                        |
| alpha-chamigrene                                            | 19912-83-5 | Terpene  | U           | (Polizzi <i>et al.</i> , 2012)                                                                             | [38]                 | Wallpaper                                  |
| alpha-corocalene                                            | 20129-39-9 | Terpene  | T*          | (Josselin <i>et al.</i> , 2021)                                                                            | [36]                 | PDA                                        |
| 1-2-(2-methyloxy-1-methylethoxy)-1-methylethoxy-propan-2-ol | 20324-33-8 | Alcohol  | T           | (De Lucca <i>et al.</i> , 2010)                                                                            | [34]                 | Cracked maize                              |
| 1-iododecane                                                | 2050-77-3  | Halogen  | T           | (De Lucca <i>et al.</i> , 2010)                                                                            | [34]                 | Cracked maize                              |
| 2-ethylbut-2-enal                                           | 20521-42-0 | Aldehyde | T           | (De Lucca <i>et al.</i> , 2012)                                                                            | [35]                 | Non-sterile cracked maize                  |
| 2,2-dimethylheptane-3,5-dione                               | 20734-29-6 | Ketone   | T           | (Sun <i>et al.</i> , 2016)                                                                                 | [40]                 | CSA, CDL, MEA, CMA                         |
| 4-methylpent-2-yne                                          | 21020-27-9 | Alkyne   | T           | (De Lucca <i>et al.</i> , 2012)                                                                            | [35]                 | Non-sterile cracked maize                  |
| 2-octadecoxyethanol                                         | 2136-72-3  | Alcohol  | T           | (De Lucca <i>et al.</i> , 2012)                                                                            | [35]                 | Non-sterile cracked maize                  |
| alpha-calacorene                                            | 21391-99-1 | Terpene  | T           | (Josselin <i>et al.</i> , 2021)                                                                            | [36]                 | PDA                                        |
| 4-methyloctane                                              | 2216-34-4  | Alkane   | T<br>T      | (De Lucca <i>et al.</i> , 2010)<br>(De Lucca <i>et al.</i> , 2012)                                         | [34]<br>[35]         | Cracked maize<br>Non-sterile cracked maize |
| gamma-gurjunene                                             | 22567-17-5 | Terpene  | T<br>U<br>U | (Josselin <i>et al.</i> , 2021)<br>(Jeleń and Wąsowicz, 1998)<br>(Zeringue, Bhatnagar and Cleveland, 1993) | [36]<br>[41]<br>[45] | PDA<br>/<br>Adye and Mateles liquid medium |
| 1-hepten-3-yne                                              | 2384-73-8  | Alkyne   | NT          | (De Lucca <i>et al.</i> , 2012)                                                                            | [35]                 | Non-sterile cracked maize                  |
| germacrene-d                                                | 23986-74-5 | Terpene  | T<br>T      | (Josselin <i>et al.</i> , 2021)<br>(Sun <i>et al.</i> , 2016)                                              | [36]<br>[40]         | PDA<br>CDA, CSA, CDL, MEa                  |
| n-methyloctan-1-amine                                       | 2439-54-5  | Amine    | T           | (De Lucca <i>et al.</i> , 2012)                                                                            | [35]                 | Non-sterile cracked maize                  |
| alpha-cadinene                                              | 24406-05-1 | Terpene  | T           | (Josselin <i>et al.</i> , 2021)                                                                            | [36]                 | PDA                                        |
| 1,2-dimethylcyclopene                                       | 2452-99-5  | Alkene   | T           | (De Lucca <i>et al.</i> , 2012)                                                                            | [35]                 | Non-sterile cracked maize                  |
| (3E)-3-methylhexa-1,3,5-triene                              | 24587-26-6 | Alkene   | T           | (De Lucca <i>et al.</i> , 2012)                                                                            | [35]                 | Non-sterile cracked maize                  |
| 2-methylhexadecan-1-ol                                      | 2490-48-4  | Alcohol  | T           | (De Lucca <i>et al.</i> , 2012)                                                                            | [35]                 | Non-sterile cracked maize                  |
| 5-methyltridecane                                           | 25117-31-1 | Alkane   | T           | (De Lucca <i>et al.</i> , 2012)                                                                            | [35]                 | Non-sterile cracked maize                  |
| (Z)-1,3-dimethylcyclopentane                                | 2532-58-3  | Alkane   | T           | (De Lucca <i>et al.</i> , 2012)                                                                            | [35]                 | Sterile cracked maize                      |
| (E)-2-octanal                                               | 2548-87-0  | Aldehyde | T           | (Müller <i>et al.</i> , 2013)                                                                              | [37]                 | Maize silk                                 |
| hept-3-yne                                                  | 2586-89-2  | Alkyne   | T           | (De Lucca <i>et al.</i> , 2012)                                                                            | [35]                 | Sterile cracked maize                      |
| (Z)-oct-2-en-1-ol                                           | 26001-58-1 | Alcohol  | T<br>U      | (De Lucca <i>et al.</i> , 2010)<br>(Jeleń and Wąsowicz, 1998)                                              | [34]<br>[41]         | Cracked maize<br>/                         |
| tetrahydro-6,6-dimethyl-2h-pyran-2-one                      | 2610-95-9  | Ketone   | T           | (De Lucca <i>et al.</i> , 2012)                                                                            | [35]                 | Non-sterile cracked maize                  |
| 4-methylhept-6-en-3-one                                     | 26118-97-8 | Ketone   | T           | (Spraker <i>et al.</i> , 2014)                                                                             | [44]                 | Glucose minimal medium (GMM)               |
| 4-methylheptadecane                                         | 26429-11-8 | Alkane   | T           | (De Lucca <i>et al.</i> , 2012)                                                                            | [35]                 | Non-sterile cracked maize                  |
| 7-methyltridecane                                           | 26730-14-3 | Alkane   | T           | (De Lucca <i>et al.</i> , 2012)                                                                            | [35]                 | Non-sterile cracked maize                  |
| (Z)-hexadec-2-ene                                           | 26741-29-7 | Alkene   | T           | (Sun <i>et al.</i> , 2016)                                                                                 | [40]                 | CDA, CSA, MEA, CMA                         |
| 4,4-dimethyl-1,2-pentadiene                                 | 26981-77-1 | Alkene   | T           | (De Lucca <i>et al.</i> , 2012)                                                                            | [35]                 | Non-sterile cracked maize                  |

|                                         |            |         |      |                                           |      |                                 |
|-----------------------------------------|------------|---------|------|-------------------------------------------|------|---------------------------------|
| 1,2-benzisothiazole                     | 272-16-2   | Other   | T    | (De Lucca <i>et al.</i> , 2010)           | [34] | Cracked maize                   |
| cyclopropene                            | 2781-85-3  | Alkene  | T    | (De Lucca <i>et al.</i> , 2012)           | [35] | Sterile cracked maize           |
|                                         |            |         | T    | (De Lucca <i>et al.</i> , 2010)           | [34] | Non-sterile cracked maize       |
| 1-methoxybut-1-en-3-yne                 | 2798-73-4  | Alkyne  | T    | (De Lucca <i>et al.</i> , 2012)           | [35] | Non-sterile cracked maize       |
| hexa-2,4-diyne                          | 2809-69-0  | Alkyne  | T    | (De Lucca <i>et al.</i> , 2012)           | [35] | Non-sterile cracked maize       |
| 4-methyldecane                          | 2847-72-5  | Alkane  | NT/T | (De Lucca <i>et al.</i> , 2010)           | [34] | Cracked maize                   |
| beta-acoradiene                         | 28477-64-7 | Terpene | U    | (Polizzi <i>et al.</i> , 2012)            | [38] | Wallpaper                       |
| gamma-selinene                          | 28624-23-9 | Terpene | U    | (Jeleń and Wąsowicz, 1998)                | [41] | /                               |
|                                         |            |         | T    | (Zeringue, Bhatnagar and Cleveland, 1993) | [45] | Adye and Mateles liquid medium  |
| 1,3-dimethyl-2-ethylbenzene             | 2870-04-4  | Alkene  | U    | (Jeleń and Wąsowicz, 1998)                | [41] | /                               |
| 3-methylhexa-2,4-diene                  | 28823-42-9 | Alkene  | T    | (De Lucca <i>et al.</i> , 2012)           | [35] | Non-sterile cracked maize       |
| gamma-curcumene                         | 28976-68-3 | Terpene | U    | (Polizzi <i>et al.</i> , 2012)            | [38] | Wallpaper                       |
| cyclobutanol                            | 2919-23-5  | Alcohol | T    | (De Lucca <i>et al.</i> , 2012)           | [35] | Sterile cracked maize           |
| cyclodecane                             | 293-96-9   | Alkane  | T    | (De Lucca <i>et al.</i> , 2010)           | [34] | Cracked maize                   |
| cyclododecane                           | 294-62-2   | Alkane  | T    | (De Lucca <i>et al.</i> , 2010)           | [34] | Cracked maize                   |
| 4-methylundecane                        | 2980-69-0  | Alkane  | T    | (De Lucca <i>et al.</i> , 2010)           | [34] | Cracked maize                   |
| o-decylhydroxylamine                    | 29812-79-1 | Amine   | T    | (De Lucca <i>et al.</i> , 2012)           | [35] | Non-sterile cracked maize       |
| gamma-murolene                          | 30021-74-0 | Terpene | U    | (Jeleń and Wąsowicz, 1998)                | [41] | /                               |
|                                         |            |         | T    | (Josselin <i>et al.</i> , 2021)           | [36] | PDA                             |
| (Z)-9-octadecenamide                    | 301-02-0   | Amide   | T    | (De Lucca <i>et al.</i> , 2010)           | [34] | PDA                             |
| 2,6,11-trimethyldodecane                | 31295-56-4 | Alkane  | T    | (De Lucca <i>et al.</i> , 2010)           | [34] | Cracked maize                   |
|                                         |            |         | T    | (De Lucca <i>et al.</i> , 2012)           | [35] | Non-sterile cracked maize       |
| alpha-murolene                          | 31983-22-9 | Terpene | T    | (Zeringue, Bhatnagar and Cleveland, 1993) | [45] | Adye and Mateles liquid medium  |
|                                         |            |         | T    | (Josselin <i>et al.</i> , 2021)           | [36] | PDA                             |
| 2-ethylfuran                            | 3208-16-0  | Furan   | T    | (De Lucca <i>et al.</i> , 2012)           | [35] | Non-sterile cracked maize       |
|                                         |            |         | T    | (Sun <i>et al.</i> , 2014)                | [39] | Maize media                     |
| 2,4,5-trimethyl-1,3-dioxolane           | 3299-32-9  | Other   | NT/T | (Josselin <i>et al.</i> , 2021)           | [36] | PDA                             |
| decanoic acid                           | 334-48-5   | Acid    | T    | (De Lucca <i>et al.</i> , 2010)           | [34] | Cracked maize                   |
| 1-octen-3-ol                            | 3391-86-4  | Alcohol | T    | (Kamiński <i>et al.</i> , 1972),          | [43] | /                               |
|                                         |            |         | U    | (Polizzi <i>et al.</i> , 2012)*           | [38] | Malt extract agar               |
|                                         |            |         | NT/T | (Sun <i>et al.</i> , 2014)                | [39] | Maize media                     |
| (Z)-hexadec-3-ene                       | 34303-81-6 | Alkene  | T    | (Sun <i>et al.</i> , 2016)                | [40] | CDA, CSA, CDL, MEA, CMA         |
| thiochroman-4-one                       | 3528-17-4  | Ketone  | T*   | (Josselin <i>et al.</i> , 2021)           | [36] | PDA                             |
| (E)-hexadec-7-ene                       | 35507-09-6 | Alkene  | T    | (Sun <i>et al.</i> , 2016)                | [40] | CSA, CDL, MEA, CMA              |
| 2-methoxyethylbenzene                   | 3558-60-9  | Alkene  | T    | (De Lucca <i>et al.</i> , 2012)           | [35] | Non-sterile cracked maize       |
| alpha-guaiene                           | 3691-12-1  | Terpene | T    | (Sun <i>et al.</i> , 2016)                | [40] | CDA, CSA, CDL, CMA              |
| 2,4-dimethylfuran                       | 3710-43-8  | Furan   | T    | (Sun <i>et al.</i> , 2014)                | [39] | Maize media                     |
| 2-nonenoic acid*                        | 3760-11-0  | Acid    | T    | (De Lucca <i>et al.</i> , 2012)           | [35] | Non-sterile cracked maize       |
| 2-pentylfuran                           | 3777-69-3  | Furan   | T    | (De Lucca <i>et al.</i> , 2010)           | [34] | Cracked maize                   |
|                                         |            |         | NT/T | (Sun <i>et al.</i> , 2014)                | [39] | Maize media                     |
| 5,6,7-trimethoxy-2,3-dihydroinden-1-one | 38472-90-1 | Ketone  | T    | (De Lucca <i>et al.</i> , 2010)           | [34] | Cracked maize                   |
| alpha-copaene                           | 3856-25-5  | Terpene | U    | (Jeleń and Wąsowicz, 1998)                | [41] | /                               |
|                                         |            |         | T    | (Josselin <i>et al.</i> , 2021)           | [36] | PDA                             |
|                                         |            |         | T    | (Zeringue, Bhatnagar and Cleveland, 1993) | [45] | Adye and Mateles liquid medium  |
| gamma-cadinene                          | 39029-41-9 | Terpene | T    | (Josselin <i>et al.</i> , 2021)           | [36] | PDA                             |
|                                         |            |         | T    | (Polizzi <i>et al.</i> , 2012)*           | [38] | Adye and Mateles liquid medium, |
|                                         |            |         | T    | (Zeringue, Bhatnagar and Cleveland, 1993) | [45] | Malt extract agar               |

|                                                                 |                |          |                          |                                                                                                                                                                            |                                      |                                                                         |
|-----------------------------------------------------------------|----------------|----------|--------------------------|----------------------------------------------------------------------------------------------------------------------------------------------------------------------------|--------------------------------------|-------------------------------------------------------------------------|
| 2-butyloctan-1-ol                                               | 3913-02-8      | Alcohol  | T                        | (Josselin <i>et al.</i> , 2021)                                                                                                                                            | [36]                                 | PDA                                                                     |
| (2E,5E)-hepta-2,5-diene                                         | 39619-60-8     | Alkene   | T                        | (De Lucca <i>et al.</i> , 2012)                                                                                                                                            | [35]                                 | Non-sterile cracked maize                                               |
| 1,3-cycloheptadiene                                             | 4054-38-0      | Alkene   | T                        | (De Lucca <i>et al.</i> , 2012)                                                                                                                                            | [35]                                 | Non-sterile cracked maize                                               |
| 4-methoxy-2,5-dimethylfuran-3-one                               | 4077-47-8      | Ketone   | T                        | (De Lucca <i>et al.</i> , 2010)                                                                                                                                            | [34]                                 | Cracked maize                                                           |
| epizonaren                                                      | 41702-63-0     | Terpene  | NT<br>U<br>T<br>T        | (De Lucca <i>et al.</i> , 2012)<br>(Jeleń and Wąsowicz, 1998)<br>(Josselin <i>et al.</i> , 2021)<br>(Zeringue, Bhatnagar and Cleveland, 1993)                              | [35]<br>[41]<br>[36]<br>[45]         | Non-sterile cracked maize<br>/<br>PDA<br>Adye and Mateles liquid medium |
| but-2-enal                                                      | 4170-30-3      | Aldehyde | T                        | (De Lucca <i>et al.</i> , 2012)                                                                                                                                            | [35]                                 | Sterile cracked maize                                                   |
| eicos-9-ene                                                     | 42448-90-8     | Alkene   | T                        | (De Lucca <i>et al.</i> , 2012)                                                                                                                                            | [35]                                 | Non-sterile cracked maize                                               |
| 1,1,2-trimethylcyclopentane                                     | 4259-00-1      | Alkane   | T                        | (De Lucca <i>et al.</i> , 2012)                                                                                                                                            | [35]                                 | Non-sterile cracked maize                                               |
| butan-2,3-dione                                                 | 431-03-8       | Ketone   | NT/T                     | (Sun <i>et al.</i> , 2014)                                                                                                                                                 | [39]                                 | Maize media                                                             |
| 2-heptyl-1,3-dioxolane                                          | 4359-57-3      | Other    | T                        | (Spraker <i>et al.</i> , 2014)                                                                                                                                             | [44]                                 | Glucose minimal medium (GMM)                                            |
| mono(2-ethylhexyl) phthalate                                    | 4376-20-9      | Acid     | T                        | (De Lucca <i>et al.</i> , 2010)                                                                                                                                            | [34]                                 | Cracked maize                                                           |
| 2-butylofuran                                                   | 4466-24-4      | Furan    | T                        | (De Lucca <i>et al.</i> , 2012)                                                                                                                                            | [35]                                 | Sterile cracked maize                                                   |
| valencene                                                       | 4630-07-3      | Terpene  | T<br>T*<br>T<br>T        | (Jeleń and Wąsowicz, 1998)<br>(Josselin <i>et al.</i> , 2021)<br>(Sun <i>et al.</i> , 2016)<br>(Zeringue, Bhatnagar and Cleveland, 1993)                                   | [41]<br>[36]<br>[40]<br>[45]         | /<br>PDA<br>CDA, CSA, CDL, MEA, CMA<br>Adye and Mateles liquid medium   |
| 3,3-dimethylbutane-2-ol                                         | 464-07-3       | Alcohol  | T                        | (De Lucca <i>et al.</i> , 2012)                                                                                                                                            | [35]                                 | Non-sterile cracked maize                                               |
| cedrene                                                         | 469-61-4       | Terpene  | T                        | (De Lucca <i>et al.</i> , 2012)                                                                                                                                            | [35]                                 | Non-sterile cracked maize                                               |
| thujopsene                                                      | 470-40-6 (cis) | Terpene  | U                        | (Jeleń and Wąsowicz, 1998)                                                                                                                                                 | [41]                                 | /                                                                       |
| 1-methyl-4-propan-2-yl-7-oxabicyclo[2.2.1]heptane (1,4-Cineole) | 470-67-7       | Alkane   | T                        | (De Lucca <i>et al.</i> , 2010)                                                                                                                                            | [34]                                 | Cracked maize                                                           |
| eucalyptol                                                      | 470-82-6       | Terpene  | T                        | (De Lucca <i>et al.</i> , 2010)                                                                                                                                            | [34]                                 | Cracked maize                                                           |
| alpha-selinene                                                  | 473-13-2       | Terpene  | T<br>T                   | (Josselin <i>et al.</i> , 2021)<br>(Sun <i>et al.</i> , 2016)                                                                                                              | [36]<br>[40]                         | PDA<br>CDA, CSA, CDL, MEA                                               |
| alpha-cadinol                                                   | 481-34-5       | Terpene  | T<br>T                   | (Josselin <i>et al.</i> , 2021)<br>(Sun <i>et al.</i> , 2016)                                                                                                              | [36]<br>[40]                         | PDA<br>CDA, CSA, CDL, MEA                                               |
| delta-cadinene                                                  | 483-76-1       | Terpene  | U<br>NT/T<br>U<br>T<br>T | (Jeleń and Wąsowicz, 1998)<br>(Josselin <i>et al.</i> , 2021)<br>(Polizzi <i>et al.</i> , 2012)<br>(Sun <i>et al.</i> , 2016)<br>(Zeringue, Bhatnagar and Cleveland, 1993) | [41]<br>[36]<br>[38]<br>[40]<br>[45] | /<br>PDA<br>MEA<br>CSA, CDL, MEA, CMA<br>Adye and Mateles liquid medium |
| 1,6-dimethyl-4-(1-methylethyl)naphthalene                       | 483-78-3       | Alkene   | T                        | (Sun <i>et al.</i> , 2016)                                                                                                                                                 | [40]                                 | CSA, CDL, CMA                                                           |
| 1-cyclohexene-1-methanol                                        | 4845-04-9      | Alkene   | T                        | (De Lucca <i>et al.</i> , 2012)                                                                                                                                            | [35]                                 | Non-sterile cracked maize                                               |
| tetramethylbenzene                                              | 488-23-3       | Alkene   | T<br>T                   | (Jeleń and Wąsowicz, 1998)<br>(De Lucca <i>et al.</i> , 2012)                                                                                                              | [41]                                 | Agar<br>Non-sterile cracked maize                                       |
| 6,10,11,11-tetramethyltricyclo[6.3.0.1e2,3]undec-1(7)ene        | 489-39-4       | Terpene  | T                        | (Zeringue, Bhatnagar and Cleveland, 1993)                                                                                                                                  | [45]                                 | Adye and Mateles liquid medium                                          |
| alpha-gurjunene                                                 | 489-40-7       | Terpene  | U<br>T<br>T<br>T         | (Jeleń and Wąsowicz, 1998)<br>(Josselin <i>et al.</i> , 2021)<br>(Sun <i>et al.</i> , 2016)<br>(Zeringue, Bhatnagar and Cleveland, 1993)                                   | [41]<br>[36]<br>[40]<br>[45]         | /<br>PDA<br>CDA, CSA, CDL, MEA<br>Adye and Mateles liquid medium        |
| alpha-farnesene                                                 | 502-61-4       | Terpene  | T                        | (Sun <i>et al.</i> , 2016)                                                                                                                                                 | [40]                                 | CDA, CSA, CDL, CMA                                                      |
| 3,7-dimethylocta-1,3,7-triene                                   | 502-99-8       | Alkene   | T                        | (Sun <i>et al.</i> , 2016)                                                                                                                                                 | [40]                                 | CDA,CDL, MEA                                                            |

|                                         |            |          |                               |                                                                                                                                                                                                 |                                              |                                                                                              |
|-----------------------------------------|------------|----------|-------------------------------|-------------------------------------------------------------------------------------------------------------------------------------------------------------------------------------------------|----------------------------------------------|----------------------------------------------------------------------------------------------|
| 3-methylbutanoic acid                   | 503-74-2   | Acid     | T                             | (De Lucca <i>et al.</i> , 2010)                                                                                                                                                                 | [34]                                         | Cracked maize                                                                                |
| hex-2-enal                              | 505-57-7   | Aldehyde | T                             | (De Lucca <i>et al.</i> , 2012)                                                                                                                                                                 | [35]                                         | Non-sterile cracked maize                                                                    |
| (E)-9-octadecen-1-ol                    | 506-42-3   | Alcohol  | T                             | (De Lucca <i>et al.</i> , 2012)                                                                                                                                                                 | [35]                                         | Non-sterile cracked maize                                                                    |
| 2-methylbut-2-ene                       | 513-35-9   | Alkene   | T                             | (De Lucca <i>et al.</i> , 2012)                                                                                                                                                                 | [35]                                         | Non-sterile cracked maize                                                                    |
| butan-2,3-diol                          | 513-85-9   | Alcohol  | NT/T<br>NT/T                  | (De Lucca <i>et al.</i> , 2010)<br>(Josselin <i>et al.</i> , 2021)                                                                                                                              | [34]<br>[36]                                 | Cracked maize<br>PDA                                                                         |
| 3-hydroxybutan-2-one                    | 513-86-0   | Ketone   | NT/T<br>NT                    | (Josselin <i>et al.</i> , 2021)<br>(Sun <i>et al.</i> , 2014)                                                                                                                                   | [36]<br>[39]                                 | PDA<br>Maize media                                                                           |
| beta-elemene                            | 515-13-9   | Terpene  | T<br>T                        | (Josselin <i>et al.</i> , 2021)<br>(Sun <i>et al.</i> , 2016)                                                                                                                                   | [36]<br>[40]                                 | PDA<br>CDA, CSA, CDL, MEA, CMA                                                               |
| beta-cadinene                           | 523-47-7   | Terpene  | T<br>T                        | (Josselin <i>et al.</i> , 2021)<br>(Sun <i>et al.</i> , 2016)                                                                                                                                   | [36]<br>[40]                                 | PDA<br>CDA, CSA, CDL, MEA                                                                    |
| cadinene                                | 523-47-7   | Terpene  | U<br>T                        | (Jeleń and Wąsowicz, 1998)<br>(Zeringue, Bhatnagar and Cleveland, 1993)                                                                                                                         | [41]<br>[45]                                 | /<br>Adye and Mateles liquid medium                                                          |
| 3,4,5-trimethylphenol                   | 527-54-8   | Alcohol  | T                             | (De Lucca <i>et al.</i> , 2012)                                                                                                                                                                 | [35]                                         | Non-sterile cracked maize                                                                    |
| 9-butyldocosane                         | 5282-14-9  | Alkane   | T                             | (De Lucca <i>et al.</i> , 2010)                                                                                                                                                                 | [34]                                         | Cracked maize                                                                                |
| 2-methylfuran                           | 534-22-5   | Furan    | NT/T<br>T<br>U<br>T<br>T<br>T | (De Lucca <i>et al.</i> , 2010)<br>(De Lucca <i>et al.</i> , 2012)<br>(Jeleń and Wąsowicz, 1998)<br>(Josselin <i>et al.</i> , 2021)<br>(Sun <i>et al.</i> , 2014)<br>(Sun <i>et al.</i> , 2016) | [34]<br>[35]<br>[41]<br>[33]<br>[39]<br>[40] | Cracked maize<br>Sterile cracked maize<br>/<br>PDA<br>Maize media<br>CDA, CSA, CDL, MEA, CMA |
| 2-methylnon-3-ene                       | 53966-53-3 | Alkene   | T                             | (De Lucca <i>et al.</i> , 2012)                                                                                                                                                                 | [35]                                         | Non-sterile cracked maize                                                                    |
| 2, 2, 4-trimethylpentane                | 540-84-1   | Alkane   | T                             | (Spraker <i>et al.</i> , 2014)                                                                                                                                                                  | [44]                                         | Glucose minimal medium (GMM)                                                                 |
| 2,6-dimethylheptadecane                 | 54105-67-8 | Alkane   | T                             | (De Lucca <i>et al.</i> , 2012)                                                                                                                                                                 | [35]                                         | Non-sterile cracked maize                                                                    |
| 3-methylbutanamide                      | 541-46-8   | Amide    | T                             | (De Lucca <i>et al.</i> , 2012)                                                                                                                                                                 | [35]                                         | Non-sterile cracked maize                                                                    |
| epi-bicyclosesquiphellandrene           | 54274-73-5 | Terpene  | T<br>U<br>T<br>T              | (De Lucca <i>et al.</i> , 2012)<br>(Jeleń and Wąsowicz, 1998)<br>(Josselin <i>et al.</i> , 2021)<br>(Zeringue, Bhatnagar and Cleveland, 1993)                                                   | [35]<br>[41]<br>[36]<br>[45]                 | Non-sterile cracked maize<br>/<br>PDA<br>Adye and Mateles liquid medium                      |
| heptan-2-ol                             | 543-49-7   | Alcohol  | T                             | (Sun <i>et al.</i> , 2014)                                                                                                                                                                      | [39]                                         | Maize media                                                                                  |
| 1-chloropentane                         | 543-59-9   | Halogen  | T                             | (De Lucca <i>et al.</i> , 2010)                                                                                                                                                                 | [34]                                         | Cracked maize                                                                                |
| hexadecane                              | 544-76-3   | Alkane   | NT+NT/T<br>T                  | (De Lucca <i>et al.</i> , 2010)<br>(De Lucca <i>et al.</i> , 2012)                                                                                                                              | [34]<br>[35]                                 | PDA + Cracked maize<br>Non-sterile cracked maize                                             |
| dotriacotane                            | 544-85-4   | Alkane   | T                             | (De Lucca <i>et al.</i> , 2010)                                                                                                                                                                 | [34]                                         | Cracked maize                                                                                |
| decyl formate                           | 5451-52-5  | Ester    | T                             | (De Lucca <i>et al.</i> , 2012)                                                                                                                                                                 | [35]                                         | Non-sterile cracked maize                                                                    |
| beta-cedrene                            | 546-28-1   | Terpene  | U                             | (Polizzi <i>et al.</i> , 2012)                                                                                                                                                                  | [38]                                         | Wallpaper                                                                                    |
| 10-methyleicosane                       | 54833-23-7 | Alkane   | T                             | (De Lucca <i>et al.</i> , 2010)                                                                                                                                                                 | [34]                                         | Cracked maize                                                                                |
| 6-propyltridecane                       | 55045-10-8 | Alkane   | T                             | (De Lucca <i>et al.</i> , 2010)                                                                                                                                                                 | [34]                                         | Cracked maize                                                                                |
| viridiflorol                            | 552-02-3   | Terpene  | T                             | (Josselin <i>et al.</i> , 2021)                                                                                                                                                                 | [36]                                         | PDA                                                                                          |
| 5,14-dibutyloctadecane                  | 55282-13-8 | Alkane   | T                             | (De Lucca <i>et al.</i> , 2010)                                                                                                                                                                 | [34]                                         | Cracked maize                                                                                |
| 3-ethyltetracosane                      | 55282-17-2 | Alkane   | T                             | (De Lucca <i>et al.</i> , 2010)                                                                                                                                                                 | [34]                                         | Cracked maize                                                                                |
| 11-decylheneicosane                     | 55320-06-4 | Alkane   | T                             | (De Lucca <i>et al.</i> , 2012)                                                                                                                                                                 | [35]                                         | Non-sterile cracked maize                                                                    |
| 3,7,7-trimethylbicyclo[4.1.0]hept-2-ene | 554-61-0   | Terpene  | T<br>T                        | (De Lucca <i>et al.</i> , 2010)<br>(De Lucca <i>et al.</i> , 2012)                                                                                                                              | [34]<br>[35]                                 | Cracked maize<br>Non-sterile cracked maize                                                   |
| methyl 3-methylbutyrate                 | 556-24-1   | Ester    | NT/T                          | (Sun <i>et al.</i> , 2014)                                                                                                                                                                      | [39]                                         | Maize media                                                                                  |
| 2,3,3-trimethylpentane                  | 560-21-4   | Alkane   | NT/T                          | (Sun <i>et al.</i> , 2014)                                                                                                                                                                      | [39]                                         | Maize media                                                                                  |



|                                 |            |          |              |                                                                    |              |                                             |
|---------------------------------|------------|----------|--------------|--------------------------------------------------------------------|--------------|---------------------------------------------|
| o-(2-methylpropyl)hydroxylamine | 5618-62-2  | Amine    | T            | (Spraker <i>et al.</i> , 2014)                                     | [44]         | Glucose minimal medium (GMM)                |
| 3-methylbut-1-ene               | 563-45-1   | Alkene   | T            | (De Lucca <i>et al.</i> , 2012)                                    | [35]         | Sterile cracked maize                       |
| 2-methylbut-1-ene               | 563-46-2   | Alkene   | T            | (De Lucca <i>et al.</i> , 2012)                                    | [35]         | Non-sterile cracked maize                   |
| 3-methylpentan-2-one            | 565-61-7   | Ketone   | T            | (De Lucca <i>et al.</i> , 2012)                                    | [35]         | Non-sterile cracked maize                   |
| beta-panasinsene                | 56684-97-0 | Terpene  | T            | (Sun <i>et al.</i> , 2016)                                         | [40]         | CDA, CSA, CDL, MEA                          |
| 2,3-dimethylhexane              | 584-94-1   | Alkane   | NT/T         | (Sun <i>et al.</i> , 2014)                                         | [39]         | Maize media                                 |
| 2,4-dimethylhexane              | 589-43-5   | Alkane   | NT           | (Sun <i>et al.</i> , 2014)                                         | [39]         | Maize media                                 |
| octan-3-ol                      | 589-98-0   | Alcohol  | U            | (Jeleń and Wąsowicz, 1998)                                         | [41]         | /                                           |
| 3-methylbutanal                 | 590-86-3   | Aldehyde | NT/T<br>NT/T | (Josselin <i>et al.</i> , 2021)<br>(Sun <i>et al.</i> , 2014)      | [36]<br>[39] | PDA<br>Maize media                          |
| hexan-2-one                     | 591-78-6   | Ketone   | NT/T         | (De Lucca <i>et al.</i> , 2012)                                    | [35]         | Non-sterile cracked maize                   |
| penta-1,4-diene                 | 591-93-5   | Alkene   | T<br>T       | (De Lucca <i>et al.</i> , 2012)<br>(Sun <i>et al.</i> , 2016)      | [35]<br>[40] | Sterile cracked maize<br>CSA, CDL, MEA, CMA |
| penta-1,2-diene                 | 591-95-7   | Alkene   | T            | (De Lucca <i>et al.</i> , 2012)                                    | [35]         | Sterile cracked maize                       |
| 2,5-dimethylhexane              | 592-13-2   | Alkane   | NT           | (Sun <i>et al.</i> , 2014)                                         | [39]         | Maize media                                 |
| hept-1-ene*                     | 592-76-7   | Alkene   | T            | (De Lucca <i>et al.</i> , 2012)                                    | [35]         | Non-sterile cracked maize                   |
| heptacosane                     | 593-49-7   | Alkane   | T            | (Sun <i>et al.</i> , 2016)                                         | [40]         | CDA, CDL, MEA, CMA                          |
| 2,2,3,3-tetramethylbutane       | 594-82-1   | Alkane   | NT/T         | (Sun <i>et al.</i> , 2014)                                         | [39]         | Maize media                                 |
| palustrol                       | 5986-49-2  | Terpene  | T            | (Josselin <i>et al.</i> , 2021)                                    | [36]         | PDA                                         |
| 3-methylbutan-2-amine           | 598-74-3   | Amine    | NT           | (De Lucca <i>et al.</i> , 2010)                                    | [34]         | PDA                                         |
| phenylethyl alcohol             | 60-12-8    | Alcohol  | T            | (De Lucca <i>et al.</i> , 2010)                                    | [34]         | Cracked maize                               |
| 2,2'-dimethylbiphenyl           | 605-39-0   | Alkene   | T            | (De Lucca <i>et al.</i> , 2010)                                    | [34]         | Cracked maize                               |
| (Z)-don-2-enal                  | 60784-31-8 | Aldehyde | T            | (De Lucca <i>et al.</i> , 2012)                                    | [35]         | Non-sterile cracked maize                   |
| 4,6-dimethyldodecane            | 61141-72-8 | Alkane   | T            | (Josselin <i>et al.</i> , 2021)                                    | [36]         | PDA                                         |
| 4-methyldodecane                | 6117-97-1  | Alkane   | T            | (De Lucca <i>et al.</i> , 2012)                                    | [35]         | Non-sterile cracked maize                   |
| 4-methylheptan-3-one            | 6137-11-7  | Ketone   | T            | (De Lucca <i>et al.</i> , 2012)                                    | [35]         | Non-sterile cracked maize                   |
| 4-methyl-2-propyl furan         | 6148-37-4  | Furan    | T            | (De Lucca <i>et al.</i> , 2012)                                    | [35]         | Non-sterile cracked maize                   |
| 1-penten-3-ol                   | 616-25-1   | Alcohol  | U            | (Jeleń and Wąsowicz, 1998)                                         | [41]         | /                                           |
| 3-methylthiophene               | 616-44-4   | Other    | T            | (De Lucca <i>et al.</i> , 2010)                                    | [34]         | Cracked maize                               |
| 7-methylpentadecane             | 6165-40-8  | Alkane   | T            | (De Lucca <i>et al.</i> , 2012)                                    | [35]         | Non-sterile cracked maize                   |
| 3-phenoxypropan-1-ol            | 6180-61-6  | Alcohol  | T            | (De Lucca <i>et al.</i> , 2010)                                    | [34]         | PDA + Cracked maize                         |
| 2,3,6-trimethyloctane           | 62016-33-5 | Alkane   | T            | (De Lucca <i>et al.</i> , 2010)                                    | [34]         | Cracked maize                               |
| 2,4,6-trimethyldecane           | 62108-27-4 | Alkane   | T<br>T       | (De Lucca <i>et al.</i> , 2010)<br>(De Lucca <i>et al.</i> , 2012) | [34]<br>[35] | Cracked maize<br>Non-sterile cracked maize  |
| 1-ethyl-4-methylbenzene         | 622-96-8   | Alkene   | NT           | (De Lucca <i>et al.</i> , 2012)                                    | [35]         | Non-sterile cracked maize                   |
| benzenamine                     | 62-53-3    | Amine    | T            | (De Lucca <i>et al.</i> , 2010)                                    | [34]         | Cracked maize                               |
| 2,5-dimethylfuran               | 625-86-5   | Furan    | T<br>NT/T    | (De Lucca <i>et al.</i> , 2010)<br>(Josselin <i>et al.</i> , 2021) | [34]<br>[36] | Cracked maize<br>PDA                        |
| pent-2-yn-1-ol                  | 6261-22-9  | Alcohol  | T            | (De Lucca <i>et al.</i> , 2012)                                    | [35]         | Non-sterile cracked maize                   |
| 1-methoxy-3-methylbutane        | 626-91-5   | Alkane   | T            | (De Lucca <i>et al.</i> , 2012)                                    | [35]         | Non-sterile cracked maize                   |
| hexan-2-ol                      | 626-93-7   | Alcohol  | T            | (De Lucca <i>et al.</i> , 2012)                                    | [35]         | Sterile cracked maize                       |
| pent-1-yne                      | 627-19-0   | Alkyne   | T            | (De Lucca <i>et al.</i> , 2012)                                    | [35]         | Non-sterile cracked maize                   |
| 1,4-cyclohexadiene              | 628-41-1   | Alkene   | T            | (De Lucca <i>et al.</i> , 2012)                                    | [35]         | Non-sterile cracked maize                   |
| nonan-2-ol                      | 628-99-9   | Alcohol  | T            | (De Lucca <i>et al.</i> , 2012)                                    | [35]         | Non-sterile cracked maize                   |
| tridecane                       | 629-50-5   | Alkane   | NT/T<br>T    | (De Lucca <i>et al.</i> , 2010)<br>(De Lucca <i>et al.</i> , 2012) | [34]<br>[35] | Cracked maize<br>Non-sterile cracked maize  |

|                                       |            |          |      |                                 |      |                           |
|---------------------------------------|------------|----------|------|---------------------------------|------|---------------------------|
| tetradecane                           | 629-59-4   | Alkane   | T    | (De Lucca <i>et al.</i> , 2010) | [34] | Cracked maize             |
| pentadecane                           | 629-62-9   | Alkane   | NT/T | (De Lucca <i>et al.</i> , 2010) | [34] | Cracked maize             |
|                                       |            |          | T    | (De Lucca <i>et al.</i> , 2012) | [35] | Sterile cracked maize     |
| heptadecane                           | 629-78-7   | Alkane   | T    | (De Lucca <i>et al.</i> , 2010) | [34] | PDA                       |
|                                       |            |          | T    | (De Lucca <i>et al.</i> , 2012) | [35] | Non-sterile cracked maize |
|                                       |            |          | T    | (Josselin <i>et al.</i> , 2021) | [36] | PDA                       |
| nonadecane                            | 629-92-5   | Alkane   | T    | (De Lucca <i>et al.</i> , 2010) | [34] | Cracked maize             |
|                                       |            |          | T/NT | (De Lucca <i>et al.</i> , 2012) | [35] | Non-sterile cracked maize |
| heneicosane                           | 629-94-7   | Alkane   | NT/T | (De Lucca <i>et al.</i> , 2010) | [34] | Cracked maize             |
| eicosan-1-ol                          | 629-96-9   | Alcohol  | T    | (De Lucca <i>et al.</i> , 2010) | [34] | Cracked maize             |
| docosane                              | 629-97-0   | Alkane   | NT   | (De Lucca <i>et al.</i> , 2010) | [34] | Cracked maize             |
| octacosane                            | 630-02-4   | Alkane   | T    | (De Lucca <i>et al.</i> , 2010) | [34] | Cracked maize, Sterile    |
|                                       |            |          | T    | (De Lucca <i>et al.</i> , 2012) | [35] | Non sterile cracked maize |
| nonacosane                            | 630-03-5   | Alkane   | T    | (De Lucca <i>et al.</i> , 2010) | [34] | Cracked maize             |
|                                       |            |          | T    | (De Lucca <i>et al.</i> , 2012) | [35] | Sterile cracked maize     |
| isopropyl butanoate                   | 638-11-9   | Ester    | T    | (De Lucca <i>et al.</i> , 2010) | [34] | Cracked maize             |
| 2,6,10,14-tetramethylhexadecane       | 638-36-8   | Alkane   | T    | (De Lucca <i>et al.</i> , 2012) | [35] | Non-sterile cracked maize |
| ethanol                               | 64-17-5    | Alcohol  | T    | (De Lucca <i>et al.</i> , 2010) | [34] | Cracked maize             |
|                                       |            |          | T    | (De Lucca <i>et al.</i> , 2012) | [35] | Sterile cracked maize     |
|                                       |            |          | NT/T | (Josselin <i>et al.</i> , 2021) | [36] | PDA                       |
|                                       |            |          | T    | (Sun <i>et al.</i> , 2016)      | [40] | CDA, CSA, CDL, MEA, CMA   |
| 3-methylhexadecane                    | 6418-43-5  | Alkane   | T    | (De Lucca <i>et al.</i> , 2010) | [34] | Cracked maize             |
|                                       |            |          | T    | (De Lucca <i>et al.</i> , 2012) | [35] | Non-sterile cracked maize |
| 3-methyleicosane                      | 6418-46-8  | Alkane   | T    | (De Lucca <i>et al.</i> , 2012) | [35] | Sterile cracked maize     |
| acetic acid                           | 64-19-7    | Acid     | NT/T | (De Lucca <i>et al.</i> , 2010) | [34] | Cracked maize             |
|                                       |            |          | NT/T | (Josselin <i>et al.</i> , 2021) | [36] | PDA                       |
|                                       |            |          | T*   | (Sun <i>et al.</i> , 2014)      | [39] | Maize media               |
| (Z)-5-octen-1-ol                      | 64275-73-6 | Alcohol  | T    | (De Lucca <i>et al.</i> , 2012) | [35] | Non-sterile cracked maize |
| 2-methylbiphenyl                      | 643-58-3   | Alkene   | T    | (De Lucca <i>et al.</i> , 2010) | [34] | Cracked maize             |
| 3-methyl-1,1''-biphenyl               | 643-93-6   | Alkane   | NT/T | (De Lucca <i>et al.</i> , 2010) | [34] | Cracked maize             |
| alpha-curcumene                       | 644-30-4   | Terpene  | U    | (Polizzi <i>et al.</i> , 2012)  | [38] | wallpaper                 |
| (E)-pent-2-ene                        | 646-04-8   | Alkene   | T    | (De Lucca <i>et al.</i> , 2010) | [34] | Non-sterile cracked maize |
|                                       |            |          | NT/T | (De Lucca <i>et al.</i> , 2012) | [35] | Sterile cracked maize     |
| tetracosane                           | 646-31-1   | Alkane   | T    | (De Lucca <i>et al.</i> , 2010) | [34] | Cracked maize             |
|                                       |            |          | T    | (De Lucca <i>et al.</i> , 2012) | [35] | Sterile cracked maize     |
| alpha-isocomene                       | 65372-78-3 | Terpene  | T    | (Josselin <i>et al.</i> , 2021) | [36] | PDA                       |
| benzoic acid                          | 65-85-0    | Acid     | NT   | (De Lucca <i>et al.</i> , 2010) | [34] | PDA                       |
|                                       |            |          | T    | (De Lucca <i>et al.</i> , 2012) | [35] | Non-sterile cracked maize |
| hexanal                               | 66-25-1    | Aldehyde | NT   | (Sun <i>et al.</i> , 2014)      | [39] | Maize media               |
|                                       |            |          | T    | (De Lucca <i>et al.</i> , 2010) | [34] | Cracked maize             |
| (4E,6E)-2,6-dimethylocta-2,4,6-triene | 673-84-7   | Alkene   | T    | (De Lucca <i>et al.</i> , 2012) | [35] | Non-sterile cracked maize |
| 2,6-dimethylocta-5,7-dien-4-one       | 6752-80-3  | Ketone   | NT   | (De Lucca <i>et al.</i> , 2010) | [34] | PDA                       |
| propan-2-ol                           | 67-63-0    | Alcohol  | NT   | (Josselin <i>et al.</i> , 2021) | [36] | PDA                       |
|                                       |            |          | T    | (Sun <i>et al.</i> , 2016)      | [40] | CDA, CSA, MEA, CMA        |
| acetone                               | 67-64-1    | Ketone   | NT/T | (Sun <i>et al.</i> , 2014)      | [39] | Maize media               |
|                                       |            |          | T    | (Sun <i>et al.</i> , 2016)      | [40] | CSA, CDL, MEA, CMA        |
| bicyclogermacrene                     | 67650-90-2 | Terpene  | T    | (De Lucca <i>et al.</i> , 2012) | [35] | Non-sterile cracked maize |

|                                 |            |          |                                  |                                                                                                                                                                                                                |                                              |                                                                                                             |
|---------------------------------|------------|----------|----------------------------------|----------------------------------------------------------------------------------------------------------------------------------------------------------------------------------------------------------------|----------------------------------------------|-------------------------------------------------------------------------------------------------------------|
| trichloromethane                | 67-66-3    | Halogen  | NT/T<br>T                        | (Josselin <i>et al.</i> , 2021)<br>(Spraker <i>et al.</i> , 2014)                                                                                                                                              | [36]<br>[44]                                 | PDA<br>Glucose minimal medium (GMM)                                                                         |
| 1,1,2,3-tetramethylcyclohexane  | 6783-92-2  | Alkane   | T                                | (De Lucca <i>et al.</i> , 2012)                                                                                                                                                                                | [35]                                         | Non-sterile cracked maize                                                                                   |
| aristolene                      | 6831-16-9  | Terpene  | U<br>T<br>T                      | (Jeleń and Wąsowicz, 1998)<br>(Sun <i>et al.</i> , 2016)<br>(Zeringue, Bhatnagar and Cleveland, 1993)                                                                                                          | [41]<br>[40]<br>[45]                         | /<br>CDA, CSA, CDL, MEA, CMA<br>Adye and Mateles liquid medium                                              |
| dipropyl 2-yl hexanedioate      | 6938-94-9  | Acid     | T                                | (De Lucca <i>et al.</i> , 2010)                                                                                                                                                                                | [34]                                         | Cracked maize                                                                                               |
| bicyclo[4.2.0]octa-1,3,5-triene | 694-87-1   | Alkene   | T<br>NT                          | (De Lucca <i>et al.</i> , 2010)<br>(De Lucca <i>et al.</i> , 2012)                                                                                                                                             | [34]<br>[35]                                 | Cracked maize<br>Sterile cracked maize                                                                      |
| pentatriacont-17-ene            | 6971-40-0  | Alkene   | T                                | (De Lucca <i>et al.</i> , 2010)                                                                                                                                                                                | [34]                                         | Cracked maize                                                                                               |
| propan-1-ol                     | 71-23-8    | Alcohol  | NT/T<br>NT/T                     | (Spraker <i>et al.</i> , 2014)<br>(Josselin <i>et al.</i> , 2021)                                                                                                                                              | [45]<br>[36]                                 | Maize media<br>PDA                                                                                          |
| butan-1-ol                      | 71-36-3    | Alcohol  | T<br>T*                          | (Spraker <i>et al.</i> , 2014)<br>(Josselin <i>et al.</i> , 2021)                                                                                                                                              | [44]<br>[36]                                 | Glucose minimal medium (GMM)<br>PDA                                                                         |
| pentan-1-ol                     | 71-41-0    | Alcohol  | NT/T                             | (Spraker <i>et al.</i> , 2014)                                                                                                                                                                                 | [44]                                         | Maize media                                                                                                 |
| benzene                         | 71-43-2    | Alkene   | T                                | (De Lucca <i>et al.</i> , 2012)                                                                                                                                                                                | [35]                                         | Non-sterile cracked maize                                                                                   |
| 2,3-dimethyloctane              | 7146-60-3  | Alkane   | T                                | (De Lucca <i>et al.</i> , 2012)                                                                                                                                                                                | [35]                                         | Non-sterile cracked maize                                                                                   |
| di-epi-1,10-cubenol             | 73365-77-2 | Terpene  | T*                               | (Josselin <i>et al.</i> , 2021)                                                                                                                                                                                | [36]                                         | PDA                                                                                                         |
| ethyl 2-methylbutyrate          | 7452-79-1  | Ester    | NT<br>NT/T*<br>NT/T              | (De Lucca <i>et al.</i> , 2010)<br>(Josselin <i>et al.</i> , 2021)<br>(Sun <i>et al.</i> , 2014)                                                                                                               | [34]<br>[36]<br>[39]                         | PDA<br>PDA<br>Maize media                                                                                   |
| nonyl-cyclopropane              | 74663-85-7 | Alkane   | T                                | (Josselin <i>et al.</i> , 2021)                                                                                                                                                                                | [36]                                         | PDA                                                                                                         |
| 1-ethyl-2-heptylcyclopropane    | 74663-86-8 | Alkane   | T                                | (De Lucca <i>et al.</i> , 2012)                                                                                                                                                                                | [35]                                         | Non-sterile cracked maize                                                                                   |
| acetaldehyde                    | 75-07-0    | Aldehyde | T                                | (Josselin <i>et al.</i> , 2021)                                                                                                                                                                                | [36]                                         | PDA                                                                                                         |
| 2,6-dimethyloctadecane          | 75163-97-2 | Alkane   | T                                | (De Lucca <i>et al.</i> , 2012)                                                                                                                                                                                | [35]                                         | Non-sterile cracked maize                                                                                   |
| dimethyl sulfide                | 75-18-3    | Other    | T<br>U<br>T                      | (De Lucca <i>et al.</i> , 2010)<br>(Gao <i>et al.</i> , 2002)<br>(Sun <i>et al.</i> , 2014)                                                                                                                    | [34]<br>[42]<br>[39]                         | Cracked maize<br>Gypsum board<br>Maize media                                                                |
| cyclopropane                    | 75-19-4    | Alkane   | U                                | (De Lucca <i>et al.</i> , 2012)                                                                                                                                                                                | [35]                                         | Non-sterile cracked maize                                                                                   |
| nitromethane                    | 75-52-5    | Halogen  | U                                | (Jeleń and Wąsowicz, 1998)                                                                                                                                                                                     | [41]                                         | /                                                                                                           |
| 3-methylbut-3-en-1-ol           | 763-32-6   | Alcohol  | T                                | (De Lucca <i>et al.</i> , 2012)                                                                                                                                                                                | [35]                                         | Non-sterile cracked maize                                                                                   |
| 2,2-dimethylbutane-1,3-diol     | 76-35-7    | Alcohol  | T                                | (De Lucca <i>et al.</i> , 2012)                                                                                                                                                                                | [35]                                         | Non-sterile cracked maize                                                                                   |
| 5-methylhexa-1,4-diene          | 763-88-2   | Alkene   | T                                | (De Lucca <i>et al.</i> , 2012)                                                                                                                                                                                | [35]                                         | Non-sterile cracked maize                                                                                   |
| bicyclo[2.2.0]hexa-2,5-diene    | 7641-77-2  | Alkene   | T*                               | (Josselin <i>et al.</i> , 2021)                                                                                                                                                                                | [36]                                         | PDA                                                                                                         |
| hex-2-yne                       | 764-35-2   | Alkyne   | T                                | (De Lucca <i>et al.</i> , 2012)                                                                                                                                                                                | [35]                                         | Non-sterile cracked maize                                                                                   |
| 1-phenoxypropan-2-ol            | 770-35-4   | Alcohol  | NT                               | (Jeleń and Wąsowicz, 1998)                                                                                                                                                                                     | [41]                                         | PDA                                                                                                         |
| 4-ethenyl-2-methoxyphenol       | 7786-61-0  | Alcohol  | T                                | (De Lucca <i>et al.</i> , 2010)                                                                                                                                                                                | [34]                                         | Cracked maize                                                                                               |
| alpha dehydro-ar-himachalene    | 78204-62-3 | Terpene  | T                                | (Josselin <i>et al.</i> , 2021)                                                                                                                                                                                | [36]                                         | PDA                                                                                                         |
| 2-methylpropan-1-ol             | 78-83-1    | Alcohol  | NT/T<br>T<br>U<br>U<br>T<br>NT/T | (De Lucca <i>et al.</i> , 2010)<br>(Gao <i>et al.</i> , 2002)<br>(Jeleń and Wąsowicz, 1998)<br>(Josselin <i>et al.</i> , 2021)<br>(Spraker <i>et al.</i> , 2014)<br>(Zeringue, Bhatnagar and Cleveland, 1993)* | [34]<br>[42]<br>[41]<br>[36]<br>[44]<br>[45] | Maize media<br>PDA + Cracked maize<br>Gypsum board+Malt extract agar<br>/<br>PDA<br>/<br>MEA + Gypsum board |
| 2-methylpropanal                | 78-84-2    | Aldehyde | NT                               | (Sun <i>et al.</i> , 2014)                                                                                                                                                                                     | [39]                                         | Maize media                                                                                                 |
| 2-methylpropenal                | 78-85-3    | Aldehyde | T                                | (De Lucca <i>et al.</i> , 2012)                                                                                                                                                                                | [35]                                         | Sterile + non-sterile cracked maize                                                                         |

|                                           |               |          |                   |                                                                                                            |                      |                                                             |
|-------------------------------------------|---------------|----------|-------------------|------------------------------------------------------------------------------------------------------------|----------------------|-------------------------------------------------------------|
| butan-2-one                               | 78-93-3       | Ketone   | T*                | (Josselin <i>et al.</i> , 2021)                                                                            | [36]                 | PDA                                                         |
| 2,3-dimethylbutane                        | 79-29-8       | Alkane   | T                 | (De Lucca <i>et al.</i> , 2010)                                                                            | [34]                 | Cracked maize                                               |
| 2-methylpropanoic acid                    | 79-31-2       | Acid     | T<br>T*<br>NT/T   | (De Lucca <i>et al.</i> , 2010)<br>(Josselin <i>et al.</i> , 2021)<br>(Sun <i>et al.</i> , 2014)           | [34]<br>[36]<br>[39] | Cracked maize<br>PDA<br>Maize media                         |
| terpineol                                 | 8006-39-1     | Terpene  | U                 | (Gao <i>et al.</i> , 2002) *                                                                               | [42]                 | Gypsum board                                                |
| alpha-pinene                              | 80-56-8       | Terpene  | T<br>NT           | (De Lucca <i>et al.</i> , 2012)<br>(Sun <i>et al.</i> , 2014)                                              | [35]<br>[39]         | Non-sterile cracked maize<br>Maize media                    |
| 1,5-hexadien-3-yne                        | 821-08-9      | Alkyne   | NT                | (De Lucca <i>et al.</i> , 2012)                                                                            | [35]                 | Non-sterile cracked maize                                   |
| nonan-2-one                               | 821-55-6      | Ketone   | NT/T              | (Sun <i>et al.</i> , 2014)                                                                                 | [39]                 | Maize media                                                 |
| (E)-2-octenoic acid                       | 871-67-6      | Acid     | T                 | (De Lucca <i>et al.</i> , 2012)                                                                            | [35]                 | Non-sterile cracked maize                                   |
| (E)-caryophyllene                         | 87-44-5       | Terpene  | T<br>T<br>T       | (Jeleń and Wąsowicz, 1998)<br>(Josselin <i>et al.</i> , 2021)<br>(Zeringue, Bhatnagar and Cleveland, 1993) | [41]<br>[36]<br>[45] | Adye and Mateles liquid medium<br>PDA<br>/                  |
| isobazzanene                              | 88661-59-0    | Terpene  | U                 | (Polizzi <i>et al.</i> , 2012)                                                                             | [38]                 | Wallpaper                                                   |
| 2,3,4-trimethylhexane                     | 921-47-1      | Alkane   | NT/T              | (Sun <i>et al.</i> , 2014)                                                                                 | [39]                 | Maize media                                                 |
| biphenyl                                  | 92-52-4       | Alkane   | NT                | (De Lucca <i>et al.</i> , 2010)                                                                            | [34]                 | PDA                                                         |
| hex-3-yne                                 | 928-49-4      | Alkyne   | T                 | (De Lucca <i>et al.</i> , 2012)                                                                            | [35]                 | Non-sterile cracked maize                                   |
| 6-methylheptan-2-one                      | 928-68-7      | Ketone   | U                 | (Polizzi <i>et al.</i> , 2012)*                                                                            | [38]                 | Malt extract agar                                           |
| 1,3,6-octatriene                          | 929-20-4      | Alkene   | T                 | (De Lucca <i>et al.</i> , 2012)                                                                            | [35]                 | Non-sterile cracked maize                                   |
| 1-methoxyoctane                           | 929-56-6      | Alkane   | T                 | (De Lucca <i>et al.</i> , 2012)                                                                            | [35]                 | Non-sterile cracked maize                                   |
| 1-ethenoxyoctadecane                      | 930-02-9      | Alkane   | T                 | (De Lucca <i>et al.</i> , 2012)                                                                            | [35]                 | Non-sterile cracked maize                                   |
| 3-methylfuran                             | 930-27-8      | Furan    | U<br>NT           | (Jeleń and Wąsowicz, 1998)<br>(De Lucca <i>et al.</i> , 2012)                                              | [41]<br>[35]         | /<br>Non-sterile cracked maize                              |
| butylcyclopropane                         | 930-57-4      | Alkane   | T                 | (De Lucca <i>et al.</i> , 2012)                                                                            | [35]                 | Non-sterile cracked maize                                   |
| 4-ethyl-1,2-dimethylbenzene               | 934-80-5      | Alkene   | T                 | (De Lucca <i>et al.</i> , 2012)                                                                            | [35]                 | Non-sterile cracked maize                                   |
| dimethylbenzene                           | 95-47-6       | Alkene   | U                 | (Jeleń and Wąsowicz, 1998)                                                                                 | [41]                 | /                                                           |
| 1,2-dimethylbenzene                       | 95-47-6       | Alkene   | T                 | (De Lucca <i>et al.</i> , 2012)                                                                            | [35]                 | Non-sterile cracked maize                                   |
| 3,4-dimethylphenol                        | 95-65-8       | Alcohol  | T                 | (De Lucca <i>et al.</i> , 2012)                                                                            | [35]                 | Non-sterile cracked maize                                   |
| isodene                                   | 95910-36-4    | Terperne | T                 | (Sun <i>et al.</i> , 2016)                                                                                 | [40]                 | CSA, CDL, MEA, CMA                                          |
| 3-methylpentane                           | 96-14-0       | Alkane   | T                 | (De Lucca <i>et al.</i> , 2012)                                                                            | [35]                 | Non-sterile cracked maize                                   |
| 2-methylbutanal                           | 96-17-3       | Aldehyde | NT/T<br>NT/T      | (Sun <i>et al.</i> , 2014)<br>(Josselin <i>et al.</i> , 2021)                                              | [39]<br>[36]         | Maize media<br>PDA                                          |
| butyrolactone                             | 96-48-0       | Other    | T                 | (De Lucca <i>et al.</i> , 2010)                                                                            | [34]                 | Cracked maize                                               |
| ethyl 2-methylpropionate                  | 97-62-1       | Ester    | T<br>NT/T<br>NT/T | (De Lucca <i>et al.</i> , 2012)<br>(Sun <i>et al.</i> , 2014)<br>(Josselin <i>et al.</i> , 2021)           | [35]<br>[39]<br>[36] | Non-sterile cracked maize<br>Maize media<br>PDA             |
| furfural                                  | 98-01-1       | Aldehyde | T<br>T            | (De Lucca <i>et al.</i> , 2010)<br>(De Lucca <i>et al.</i> , 2012)                                         | [34]<br>[35]         | Crackedv+Sterile cracked maize<br>Non-sterile cracked maize |
| acetophenone                              | 98-86-2       | Ketone   | NT/T              | (De Lucca <i>et al.</i> , 2010)                                                                            | [34]                 | Cracked maize                                               |
| (Z)-(1s,3s,6r)-4-carene                   | Not available | Alkene   | T                 | (De Lucca <i>et al.</i> , 2012)                                                                            | [35]                 | Non-sterile cracked maize                                   |
| 1-(3-propoxyphenyl)propan-2-amine         | Not available | Amine    | T                 | (De Lucca <i>et al.</i> , 2012)                                                                            | [35]                 | Sterile cracked maize                                       |
| 1-(4-aminophenyl)-3-phenyl-2-propen-1-one | Not available | Ketone   | NT                | (De Lucca <i>et al.</i> , 2010)                                                                            | [34]                 | PDA                                                         |
| 1-butylhexene                             | Not available | Alkene   | T                 | (De Lucca <i>et al.</i> , 2012)                                                                            | [35]                 | Non-sterile cracked maize                                   |
| 1-ethyl-methylbenzene                     | Not available | Alkene   | NT                | (De Lucca <i>et al.</i> , 2012)                                                                            | [35]                 | Non-sterile cracked maize                                   |
| 1-iodo-2-methylnonane                     | Not available | Halogen  | T                 | (De Lucca <i>et al.</i> , 2010)                                                                            | [34]                 | Cracked maize                                               |

|                                                          |               |         |      |                                 |      |                              |
|----------------------------------------------------------|---------------|---------|------|---------------------------------|------|------------------------------|
| 1-methoxypentadecane                                     | Not available | Alkane  | T    | (De Lucca <i>et al.</i> , 2012) | [35] | Sterile cracked maize        |
| 2-butanolic acid                                         | Not available | Acid    | T    | (De Lucca <i>et al.</i> , 2010) | [34] | Cracked maize                |
| 3-fluoro-a, 5-dihydroxy-N-methyl-benzeneethanamine       | Not available | Amine   | T    | (Spraker <i>et al.</i> , 2014)  | [44] | Glucose minimal medium (GMM) |
| 3-methyl-1-butyl acetate                                 | Not available | Ester   | T    | (De Lucca <i>et al.</i> , 2010) | [34] | Cracked maize                |
| 4-(1-methylethyl)phenol                                  | Not available | Alcohol | T    | (De Lucca <i>et al.</i> , 2012) | [35] | Non-sterile cracked maize    |
| alpha-chamipinene                                        | Not available | Terpene | T    | (Polizzi <i>et al.</i> , 2012)  | [38] | Wallpaper                    |
| benzaldehyde, 4-(methoxyethyl) acetate                   | Not available | Ester   | T    | (De Lucca <i>et al.</i> , 2012) | [35] | Non-sterile cracked maize    |
| beta-germacrene                                          | Not available | Terpene | T    | (Sun <i>et al.</i> , 2016)      | [40] | CDA, CSA, CDL, MEA           |
| esorubin hydrochloride*                                  | Not available | Other   | T    | (De Lucca <i>et al.</i> , 2012) | [35] | Non-sterile cracked maize    |
| hexaosan-1-ol                                            | Not available | Alcohol | T    | (De Lucca <i>et al.</i> , 2012) | [35] | Non-sterile cracked maize    |
| methoxyphenyl oxime                                      | Not available | Other   | NT/T | (De Lucca <i>et al.</i> , 2010) | [34] | Cracked maize                |
| n-(4-phenylazo)phenyl-2-phenylcyclopropionamide          | Not available | Ester   | T    | (De Lucca <i>et al.</i> , 2010) | [34] | Cracked maize                |
| 4-methyl-1-91-methylethyl)bicycle3.1.0]hexan-3-ol        | Not available | Alcohol | T    | (De Lucca <i>et al.</i> , 2010) | [34] | Cracked maize                |
| tetracyclo[3.3.1.1(1,8).0(2,4)]decane                    | Not available | Alkane  | T    | (De Lucca <i>et al.</i> , 2012) | [35] | Non-sterile cracked maize    |
| 6-isopropenyl-1,2,3,4-tetramethyl-1,4-cyclohexadiene     | Not available | Alkene  | NT   | (De Lucca <i>et al.</i> , 2012) | [35] | Non-sterile cracked maize    |
| (E,Z)-1,2-diethylidenecyclopentane                       | Not available | Alkane  | NT   | (Josselin <i>et al.</i> , 2021) | [36] | PDA                          |
| 2-(3,3-diphenyl-propylamino)ethanol                      | Not available | Alcohol | T    | (De Lucca <i>et al.</i> , 2012) | [35] | Sterile cracked maize        |
| 1,4-methanonaphtalene                                    | Not available | Alkene  | T    | (De Lucca <i>et al.</i> , 2010) | [34] | Cracked maize                |
| 1-(2,5-dimethoxy-4-methylsulfonylphenyl)propan-2-amine   | Not available | Amine   | T    | (Spraker <i>et al.</i> , 2014)  | [44] | Glucose minimal medium (GMM) |
| (7a-isopropenyl-4,5-dimethyloctahydroinden-4-yl)methanol | Not available | Terpene | T*   | (Josselin <i>et al.</i> , 2021) | [36] | PDA                          |
| pyrrolidine,1-8-(3-octyloxiranyl)-1-oxooctyl]-           | Not available | Other   | T    | (De Lucca <i>et al.</i> , 2012) | [35] | Non-sterile cracked maize    |

(a) IUPAC or common name of the VOC (b) VOC case number (c) Chemical family of the VOC (d) Toxigenicity of the *A. flavus* strain: (T) toxigenic, (NT) non-toxigenic, (T\*) natural mutant and (U) data unknown (e) The literature reference in relation to (f) the substrate type [No data available (/); Potato dextrose agar (PDA); Malt extract agar (MEA), Czapek solution agar (CSA) and corn meal agar (CMA) chemical defined agar (CDA) chemical defined liquid (CDL)]

## References

- [34] De Lucca, *et al.* (2010) "Volatile profiles of toxigenic and non-toxigenic *Aspergillus flavus* using SPME for solid phase extraction," *Annals of Agricultural and Environmental Medicine*, 17(2), pp. 301–308.
- [35] De Lucca, A. J. *et al.* (2012) "Volatile profiles and aflatoxin production by toxigenic and non-toxigenic isolates of *Aspergillus flavus* grown on sterile and non-sterile cracked corn," *Annals of Agricultural and Environmental Medicine*, 19(1), pp. 91–98.
- [36] Josselin, L. *et al.* (2021) "Volatile organic compounds emitted by *Aspergillus flavus* strains producing or not aflatoxin B1," *Toxins*, 13(10). doi: 10.3390/toxins13100705.
- [37] Müller, A. *et al.* (2013) "Volatile profiles of fungi - Chemotyping of species and ecological functions," *Fungal Genetics and Biology*, 54, pp. 25–33. doi: 10.1016/j.fgb.2013.02.005.
- [38] Polizzi, V. *et al.* (2012) "Identification of volatile markers for indoor fungal growth and chemotaxonomic classification of *Aspergillus* species," *Fungal Biology*. Elsevier Ltd, 116(9), pp. 941–953. doi: 10.1016/j.funbio.2012.06.001.
- [39] Sun, D. *et al.* (2014) "Monitoring MVOC Profiles over Time from Isolates of *Aspergillus flavus* Using SPME GC-MS," *Journal of Agricultural Chemistry and Environment*, 03(02), pp. 48–63. doi: 10.4236/jacen.2014.32007.
- [40] Sun, D. *et al.* (2016) "Effects of Growth Parameters on the Analysis of *Aspergillus flavus* Volatile Metabolites," pp. 1–20. doi: 10.3390/separations3020013.
- [41] Jeleń, H. and Wąsowicz, E. (1998) "Volatile fungal metabolites and their relation to the spoilage of agricultural commodities," *Food Reviews International*, 14(4), pp. 391–426. doi: 10.1080/87559129809541170.
- [42] Gao, P. *et al.* (2002) "Determination of unique microbial volatile organic compounds produced by five *aspergillus* species commonly found in problem buildings," *American Industrial Hygiene Association Journal*, 63(2), pp. 135–140. doi: 10.1080/15428110208984696.
- [43] Kamiński, E. *et al.* (1972) "Identification of the predominant volatile compounds produced by *Aspergillus flavus*," *Applied microbiology*, 24(5), pp. 721–6. Available at: <http://www.pubmedcentral.nih.gov/articlerender.fcgi?artid=380652&tool=pmcentrez&rendertype=abstract>.
- [44] Spraker, J. E. *et al.* (2014) "A Volatile Relationship: Profiling an Inter-Kingdom Dialogue Between two Plant Pathogens, *Ralstonia Solanacearum* and *Aspergillus Flavus*," *Journal of Chemical Ecology*, 40(5), pp. 502–513. doi: 10.1007/s10886-014-0432-2.
- [45] Zeringue, H. J., Bhatnagar, D. and Cleveland, T. E. (1993) "C<sub>15</sub>H<sub>24</sub> Volatile Compounds Unique to Aflatoxigenic Strains of *Aspergillus flavus*," 59(7), pp. 2264–2270.
